# Supplementary material for: An anionic porphyrinylphosphonate-based hydrogen-bonded organic framework: optimization of proton conductivity through the exchange of counterions
Source: Royal Society of Chemistry journal article supplement (doi:10.1039/d3dt01118f), 2023-01-01
Supplement: d3dt01118f1.pdf [file d3dt01118f1.pdf]

## Electronic Supporting Information

### An Anionic Porphyrinylphosphonate-Based Hydrogen-Bonded Organic Framework: Optimization of the Proton Conductivity through the Exchange of Counterions

Ekaterina A. Zhigileva, Yulia Yu. Enakieva,\* Anna A. Sinelshchikova, Vladimir V. Chernyshev, Ivan N. Senchikhin, Konstantin A. Kovalenko, Irina A. Stenina, Andrey B. Yaroslavtsev, Yulia G. Gorbunova and Aslan Yu. Tsivadze

#### TABLE OF CONTENTS

|                                                                              |    |
|------------------------------------------------------------------------------|----|
| Synthesis of <b>HOF-IPCE-1Pd</b> .....                                       | 2  |
| Spectral characterization of compounds .....                                 | 3  |
| Structural characterization of <b>HOF-IPCE-1Pd</b> .....                     | 8  |
| PXRD patterns of <b>HOF-IPCE-1Pd</b> in different solvents .....             | 16 |
| Pawley-refinements of <b>HOF-IPCE-1Pd</b> immersed in various solvents ..... | 17 |
| XPS data of <b>HOF-IPCE-1Pd</b> .....                                        | 20 |
| SEM and EDX data of <b>IPCE-HOF-1Pd</b> .....                                | 21 |
| Thermal stability of <b>HOF-IPCE-1Pd</b> .....                               | 24 |
| TG investigations of <b>HOF-IPCE-1Pd</b> .....                               | 24 |
| Sorption properties of <b>HOF-IPCE-1Pd</b> .....                             | 25 |
| Proton conductivity of <b>HOF-IPCE-1Pd</b> .....                             | 26 |
| PXRD data and Pawley-refinements of <b>HOF-IPCE-1Pd-NH<sub>3</sub></b> ..... | 29 |
| TG investigations of <b>HOF-IPCE-1Pd-NH<sub>3</sub></b> .....                | 30 |
| IR spectrum of <b>HOF-IPCE-1Pd-NH<sub>3</sub></b> .....                      | 30 |
| Proton conductivity of <b>HOF-IPCE-1Pd-NH<sub>3</sub></b> .....              | 31 |
| REFERENCES .....                                                             | 32 |

## Synthesis of HOF-IPCE-1Pd

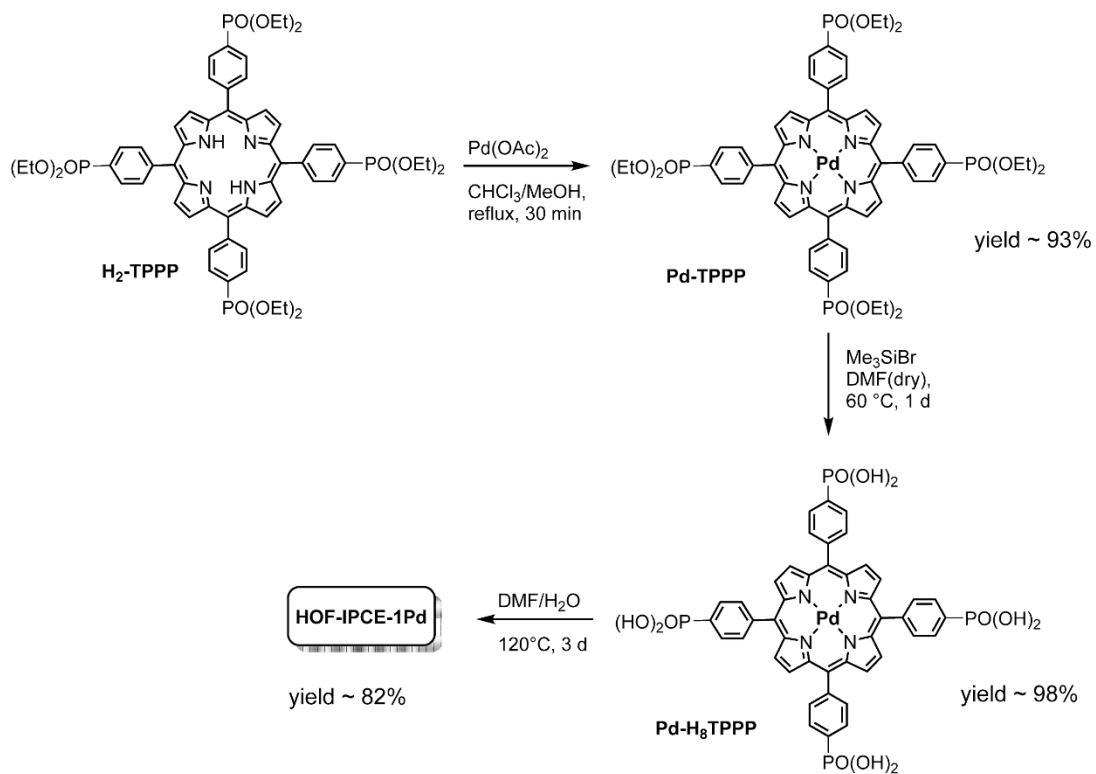

**Scheme S1.** Synthetic route towards **HOF-IPCE-1Pd**.

## Spectral characterization of compounds

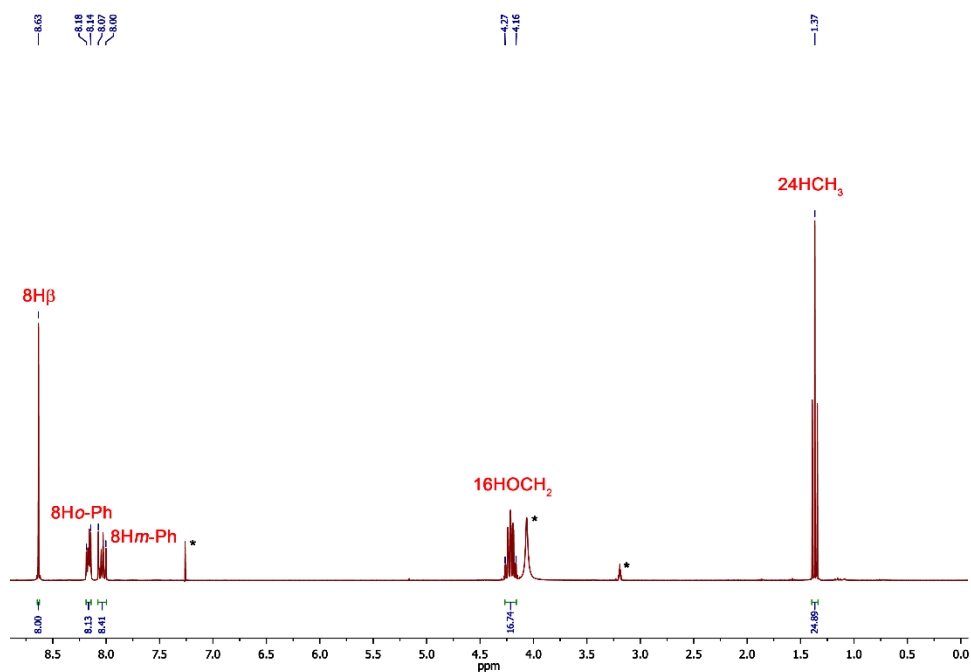

**Figure S1.**  $^1\text{H}$  NMR spectrum of **Pd-TPPP** ( $\text{CDCl}_3/\text{MeOD}$  2:1, v/v). Solvent peaks are indicated with \* ( $\delta_{\text{H}}$  7.26 ppm –  $\text{CHCl}_3$ , 4.06 ppm – DOH and  $\text{H}_2\text{O}$ , 3.19 ppm –  $\text{CHD}_2\text{OD}$ ).

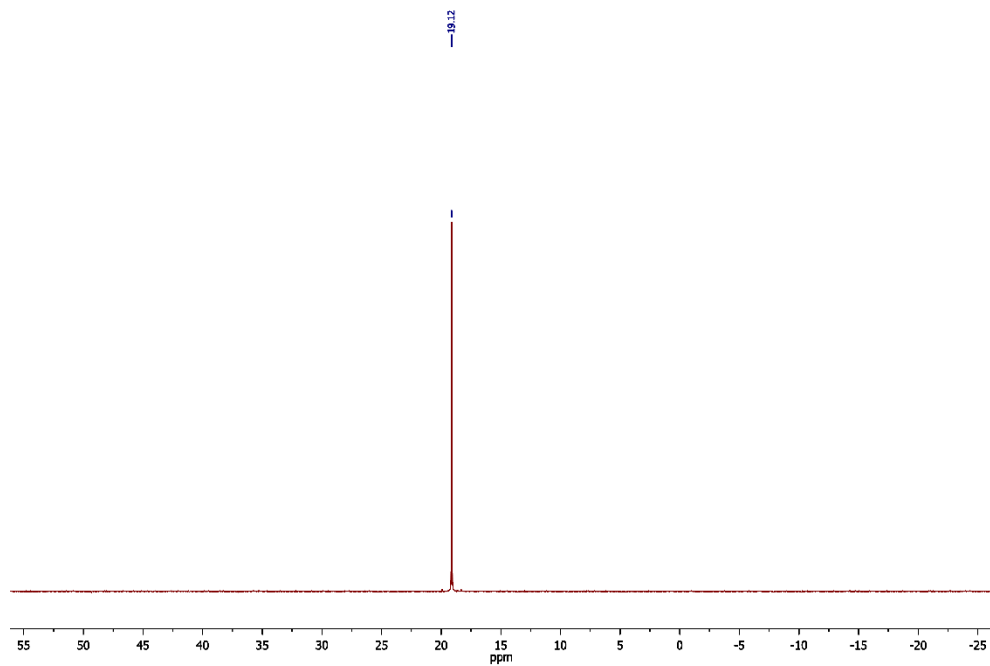

**Figure S2.**  $^{31}\text{P}\{^1\text{H}\}$  NMR spectrum of **Pd-TPPP** ( $\text{CDCl}_3/\text{MeOD}$  2:1, v/v).

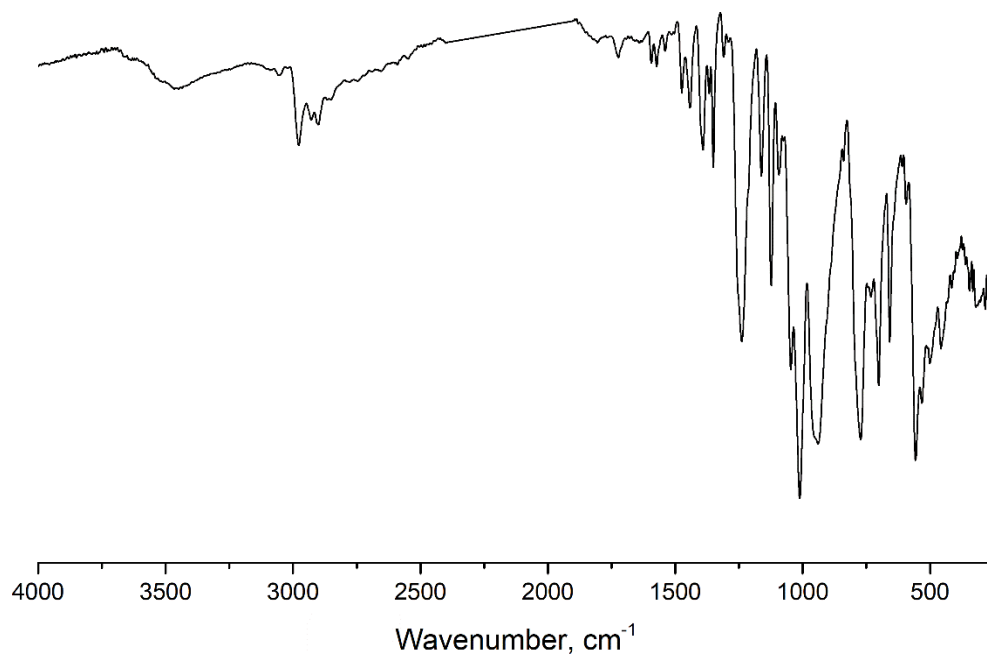

**Figure S3.** IR spectrum of **Pd-TPPP**.

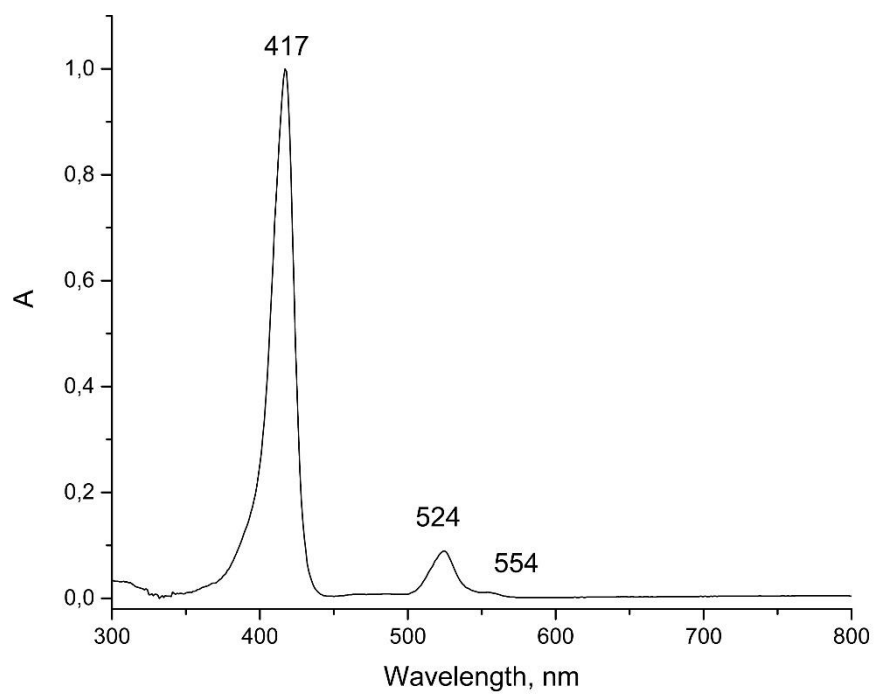

**Figure S4.** Normalized UV-vis spectrum of **Pd-TPPP** in CH<sub>2</sub>Cl<sub>2</sub> (c = 7.9 μM).

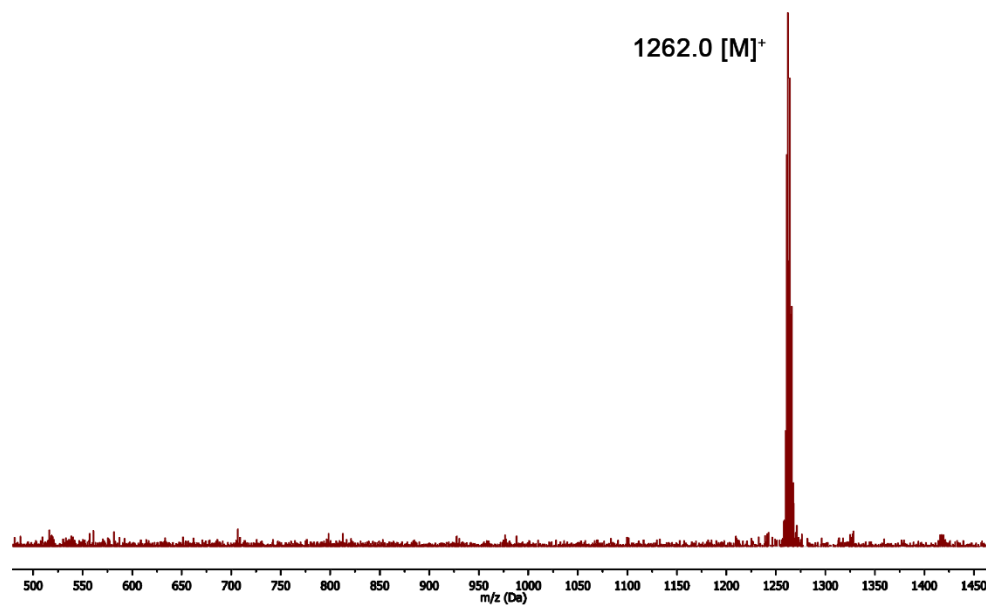

**Figure S5.** MALDI TOF mass-spectrum of **Pd-TPPP**.

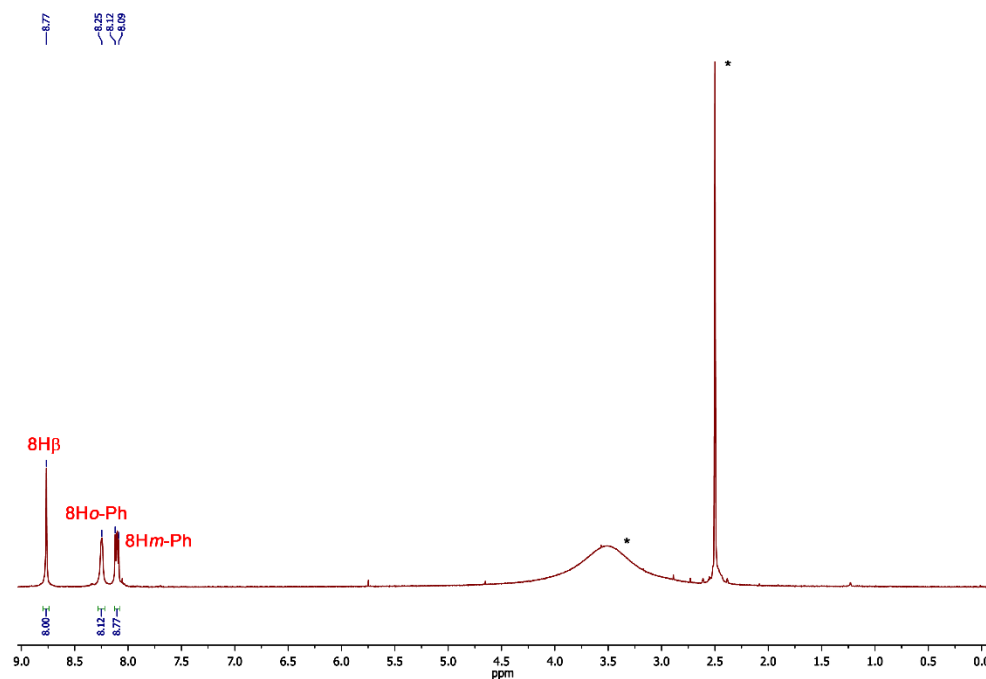

**Figure S6.** <sup>1</sup>H NMR spectrum of **Pd-H<sub>8</sub>TPPP** (DMSO-*d*<sub>6</sub>) at 333 K. Solvent peaks are indicated with \* ( $\delta_H$  3.52 ppm – DOH and H<sub>2</sub>O, 2.50 ppm – (CD<sub>3</sub>)SO(CD<sub>2</sub>H)).

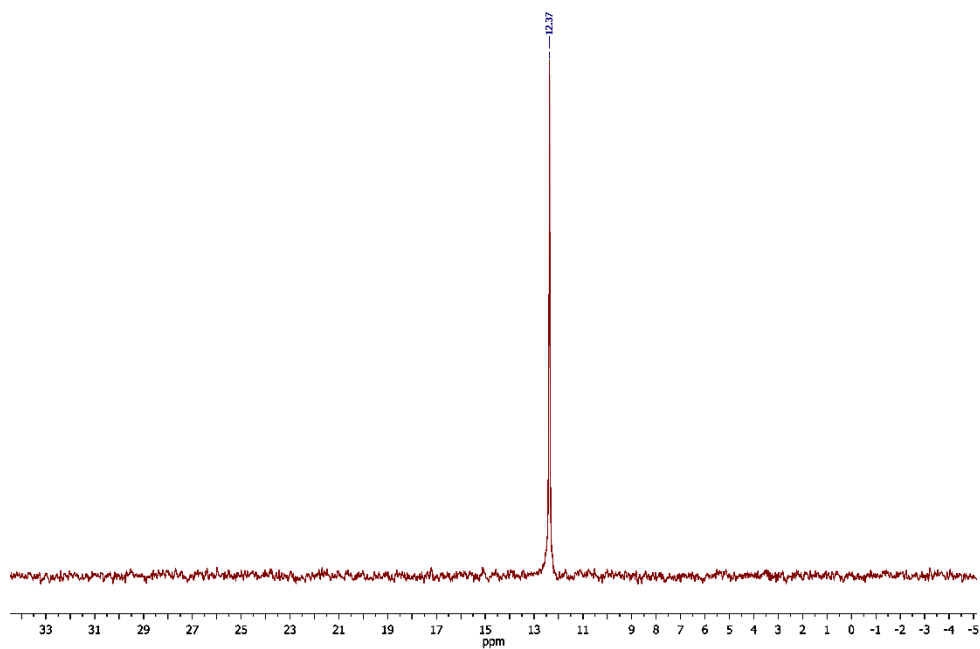

**Figure S7.**  $^{31}\text{P}\{^1\text{H}\}$  NMR spectrum of **Pd-H<sub>8</sub>TPPP** (DMSO-*d*<sub>6</sub>) at 333 K.

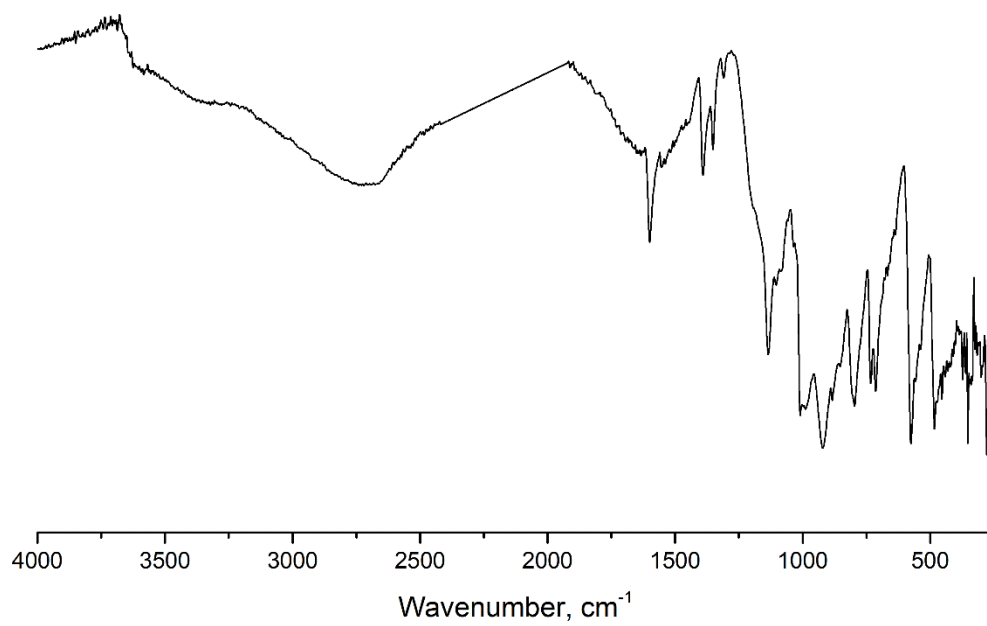

**Figure S8.** IR spectrum of **Pd-H<sub>8</sub>TPPP**.

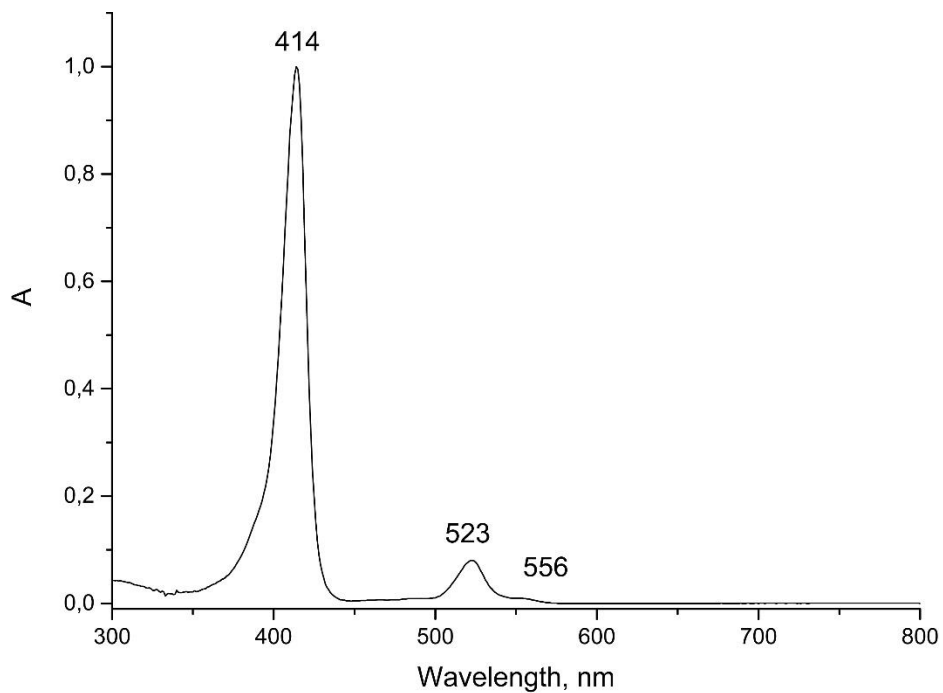

**Figure S9.** UV-vis absorption spectrum of **Pd-H<sub>8</sub>TPPP** in H<sub>2</sub>O + 50  $\mu$ L of saturated solution of NaOH in H<sub>2</sub>O ( $c = 8.65 \mu\text{M}$ ).

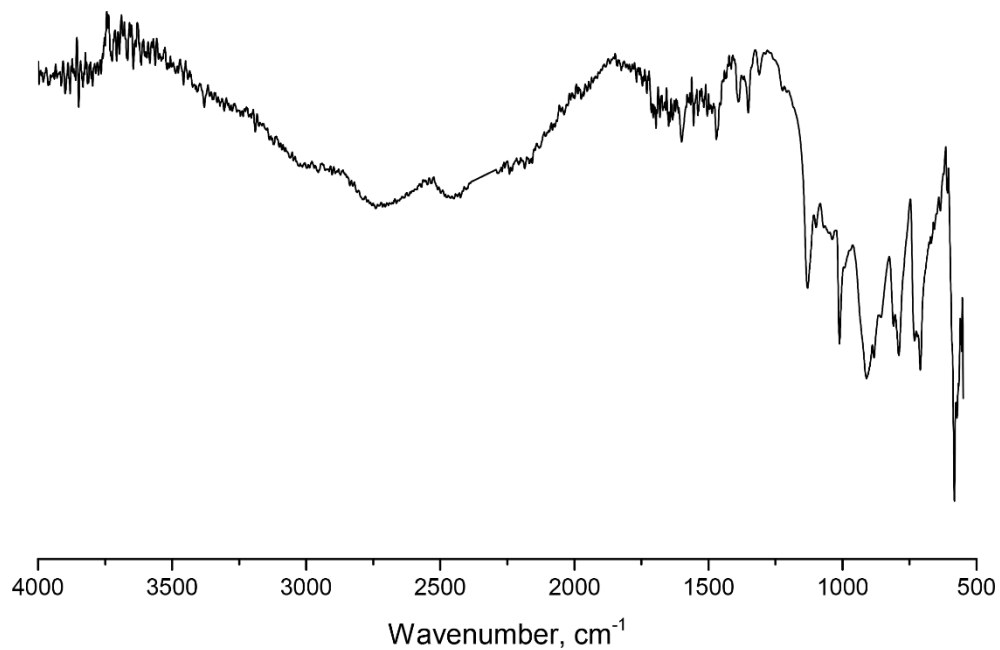

**Figure S10.** IR spectrum of **HOF-IPCE-1Pd**.

**Structural characterization of HOF-IPCE-1Pd****Table S1.** Crystal data and structure refinement for **HOF-IPCE-1Pd**.

|                                             |                                                                                                                                                        |
|---------------------------------------------|--------------------------------------------------------------------------------------------------------------------------------------------------------|
| Identification code                         | <b>HOF-IPCE-1Pd</b>                                                                                                                                    |
| CCDC number                                 | 2151260                                                                                                                                                |
| Chemical formula moiety                     | C <sub>44</sub> H <sub>29</sub> N <sub>4</sub> O <sub>12</sub> P <sub>4</sub> Pd, 3(C <sub>2</sub> H <sub>8</sub> N), C <sub>3</sub> H <sub>7</sub> NO |
| Empirical formula                           | C <sub>53</sub> H <sub>60</sub> N <sub>8</sub> O <sub>13</sub> P <sub>4</sub> Pd                                                                       |
| Formula weight                              | 1247.37                                                                                                                                                |
| Temperature/K                               | 100.15                                                                                                                                                 |
| Crystal system                              | triclinic                                                                                                                                              |
| Space group                                 | P-1                                                                                                                                                    |
| a/Å                                         | 13.0985(7)                                                                                                                                             |
| b/Å                                         | 13.8588(7)                                                                                                                                             |
| c/Å                                         | 17.8550(9)                                                                                                                                             |
| α/°                                         | 70.315(2)                                                                                                                                              |
| β/°                                         | 82.445(2)                                                                                                                                              |
| γ/°                                         | 78.492(2)                                                                                                                                              |
| Volume/Å <sup>3</sup>                       | 2983.2(3)                                                                                                                                              |
| Z                                           | 2                                                                                                                                                      |
| ρ <sub>calc</sub> /cm <sup>3</sup>          | 1.389                                                                                                                                                  |
| μ/mm <sup>-1</sup>                          | 0.484                                                                                                                                                  |
| F(000)                                      | 1288.0                                                                                                                                                 |
| Crystal size/mm <sup>3</sup>                | 0.45 × 0.3 × 0.1                                                                                                                                       |
| Radiation                                   | MoKα (λ = 0.71073)                                                                                                                                     |
| 2θ range for data collection/°              | 8.156 to 55                                                                                                                                            |
| Index ranges                                | -11 ≤ h ≤ 17, -18 ≤ k ≤ 17, -23 ≤ l ≤ 23                                                                                                               |
| Reflections collected                       | 34308                                                                                                                                                  |
| Independent reflections                     | 13510 [R <sub>int</sub> = 0.0422, R <sub>sigma</sub> = 0.0609]                                                                                         |
| Data/restraints/parameters                  | 13510/44/808                                                                                                                                           |
| Goodness-of-fit on F <sup>2</sup>           | 1.029                                                                                                                                                  |
| Final R indexes [I >= 2σ (I)]               | R <sub>1</sub> = 0.0533, wR <sub>2</sub> = 0.1360                                                                                                      |
| Final R indexes [all data]                  | R <sub>1</sub> = 0.0766, wR <sub>2</sub> = 0.1501                                                                                                      |
| Largest diff. peak/hole / e Å <sup>-3</sup> | 1.61/-0.93                                                                                                                                             |

**Table S2.** Bond lengths for **HOF-IPCE-1Pd**.

| Atom   | Atom | Length/Å |  | Atom  | Atom  | Length/Å |
|--------|------|----------|--|-------|-------|----------|
| Pd(01) | N(4) | 2.019(3) |  | C(32) | C(31) | 1.442(5) |
| Pd(01) | N(2) | 2.023(3) |  | C(27) | C(26) | 1.393(5) |
| Pd(01) | N(1) | 2.015(3) |  | C(11) | C(12) | 1.435(5) |
| Pd(01) | N(3) | 2.018(3) |  | C(30) | C(29) | 1.387(5) |



|       |       |          |  |        |        |           |
|-------|-------|----------|--|--------|--------|-----------|
| P(1)  | O(3)  | 1.520(3) |  | C(31)  | C(24)  | 1.398(5)  |
| P(1)  | O(1)  | 1.556(3) |  | C(2)   | C(1)   | 1.390(5)  |
| P(1)  | O(2)  | 1.516(3) |  | C(12)  | C(13)  | 1.387(5)  |
| P(1)  | C(6)  | 1.801(4) |  | C(39)  | C(40)  | 1.385(5)  |
| P(2)  | O(5)  | 1.503(3) |  | C(39)  | C(38)  | 1.394(5)  |
| P(2)  | O(4)  | 1.510(3) |  | C(24)  | C(23)  | 1.396(5)  |
| P(2)  | O(6)  | 1.564(3) |  | C(8)   | C(7)   | 1.394(5)  |
| P(2)  | C(17) | 1.791(4) |  | C(36)  | C(35)  | 1.493(5)  |
| P(4)  | O(10) | 1.490(3) |  | C(36)  | C(41)  | 1.393(5)  |
| P(4)  | O(11) | 1.561(3) |  | C(36)  | C(37)  | 1.389(5)  |
| P(4)  | O(12) | 1.521(3) |  | C(35)  | C(42)  | 1.402(5)  |
| P(4)  | C(39) | 1.806(4) |  | C(17)  | C(18)  | 1.398(9)  |
| P(3)  | O(8)  | 1.511(3) |  | C(17)  | C(16)  | 1.405(9)  |
| P(3)  | O(7)  | 1.525(3) |  | C(17)  | C(16A) | 1.411(10) |
| P(3)  | O(9)  | 1.572(3) |  | C(17)  | C(18A) | 1.338(13) |
| P(3)  | C(28) | 1.798(4) |  | C(4)   | C(5)   | 1.389(5)  |
| N(4)  | C(34) | 1.382(4) |  | C(41)  | C(40)  | 1.380(5)  |
| N(4)  | C(31) | 1.379(4) |  | C(13)  | C(20)  | 1.392(5)  |
| N(2)  | C(9)  | 1.370(5) |  | C(13)  | C(14)  | 1.498(5)  |
| N(2)  | C(12) | 1.372(5) |  | C(20)  | C(21)  | 1.431(6)  |
| N(2S) | C(4S) | 1.475(5) |  | C(14)  | C(19)  | 1.384(9)  |
| N(2S) | C(3S) | 1.478(5) |  | C(14)  | C(15)  | 1.364(9)  |
| N(1)  | C(42) | 1.385(5) |  | C(14)  | C(15A) | 1.454(11) |
| N(1)  | C(1)  | 1.377(5) |  | C(14)  | C(19A) | 1.325(12) |
| N(3)  | C(20) | 1.384(5) |  | C(23)  | C(22)  | 1.437(5)  |
| N(3)  | C(23) | 1.373(5) |  | C(42)  | C(43)  | 1.439(5)  |
| N(1S) | C(2S) | 1.475(5) |  | C(37)  | C(38)  | 1.390(5)  |
| N(1S) | C(1S) | 1.475(5) |  | C(1)   | C(44)  | 1.438(5)  |
| C(28) | C(27) | 1.380(5) |  | C(43)  | C(44)  | 1.345(6)  |
| C(28) | C(29) | 1.393(5) |  | C(22)  | C(21)  | 1.357(6)  |
| C(34) | C(33) | 1.439(5) |  | C(18)  | C(19)  | 1.401(10) |
| C(34) | C(35) | 1.393(5) |  | C(16)  | C(15)  | 1.382(12) |
| C(6)  | C(5)  | 1.392(5) |  | C(15A) | C(16A) | 1.416(12) |
| C(6)  | C(7)  | 1.381(5) |  | C(18A) | C(19A) | 1.419(15) |
| C(10) | C(9)  | 1.438(5) |  | N(3S)  | C(5S)  | 1.401(8)  |
| C(10) | C(11) | 1.347(6) |  | N(3S)  | C(6S)  | 1.574(11) |
| C(25) | C(30) | 1.392(5) |  | O(2S)  | C(12S) | 1.259(14) |
| C(25) | C(24) | 1.492(5) |  | N(5S)  | C(11S) | 1.392(14) |
| C(25) | C(26) | 1.395(5) |  | N(5S)  | C(12S) | 1.316(15) |
| C(9)  | C(2)  | 1.395(5) |  | N(5S)  | C(10S) | 1.471(15) |

|       |       |          |  |       |       |           |
|-------|-------|----------|--|-------|-------|-----------|
| C(3)  | C(2)  | 1.495(5) |  | O(1S) | C(9S) | 1.250(15) |
| C(3)  | C(8)  | 1.386(5) |  | N(4S) | C(9S) | 1.374(16) |
| C(3)  | C(4)  | 1.396(5) |  | N(4S) | C(7S) | 1.330(18) |
| C(32) | C(33) | 1.341(5) |  | N(4S) | C(8S) | 1.47(2)   |

**Table S3.** Bond angles for **HOF-IPCE-1Pd**.

| Atom  | Atom   | Atom   | Angle/°    |  | Atom   | Atom  | Atom   | Angle/°  |
|-------|--------|--------|------------|--|--------|-------|--------|----------|
| N(4)  | Pd(01) | N(2)   | 179.10(13) |  | N(2)   | C(12) | C(11)  | 109.3(3) |
| N(1)  | Pd(01) | N(4)   | 90.16(12)  |  | N(2)   | C(12) | C(13)  | 126.4(3) |
| N(1)  | Pd(01) | N(2)   | 89.86(12)  |  | C(13)  | C(12) | C(11)  | 124.2(4) |
| N(1)  | Pd(01) | N(3)   | 179.70(13) |  | C(30)  | C(29) | C(28)  | 120.5(4) |
| N(3)  | Pd(01) | N(4)   | 89.93(12)  |  | C(40)  | C(39) | P(4)   | 119.7(3) |
| N(3)  | Pd(01) | N(2)   | 90.06(12)  |  | C(40)  | C(39) | C(38)  | 118.3(3) |
| O(3)  | P(1)   | O(1)   | 111.40(15) |  | C(38)  | C(39) | P(4)   | 122.1(3) |
| O(3)  | P(1)   | C(6)   | 108.20(17) |  | C(31)  | C(24) | C(25)  | 118.0(3) |
| O(1)  | P(1)   | C(6)   | 104.17(16) |  | C(23)  | C(24) | C(25)  | 117.4(3) |
| O(2)  | P(1)   | O(3)   | 113.32(17) |  | C(23)  | C(24) | C(31)  | 124.6(3) |
| O(2)  | P(1)   | O(1)   | 110.61(17) |  | C(3)   | C(8)  | C(7)   | 120.5(4) |
| O(2)  | P(1)   | C(6)   | 108.67(17) |  | C(41)  | C(36) | C(35)  | 121.3(3) |
| O(5)  | P(2)   | O(4)   | 113.43(17) |  | C(37)  | C(36) | C(35)  | 120.4(3) |
| O(5)  | P(2)   | O(6)   | 112.28(16) |  | C(37)  | C(36) | C(41)  | 118.3(3) |
| O(5)  | P(2)   | C(17)  | 108.49(18) |  | C(34)  | C(35) | C(36)  | 119.0(3) |
| O(4)  | P(2)   | O(6)   | 109.82(18) |  | C(34)  | C(35) | C(42)  | 124.2(3) |
| O(4)  | P(2)   | C(17)  | 108.16(17) |  | C(42)  | C(35) | C(36)  | 116.8(3) |
| O(6)  | P(2)   | C(17)  | 104.16(18) |  | C(18)  | C(17) | P(2)   | 123.4(4) |
| O(10) | P(4)   | O(11)  | 112.54(18) |  | C(18)  | C(17) | C(16)  | 115.8(5) |
| O(10) | P(4)   | O(12)  | 117.95(19) |  | C(16)  | C(17) | P(2)   | 120.4(4) |
| O(10) | P(4)   | C(39)  | 110.09(18) |  | C(16A) | C(17) | P(2)   | 115.0(5) |
| O(11) | P(4)   | C(39)  | 106.19(18) |  | C(18A) | C(17) | P(2)   | 124.2(5) |
| O(12) | P(4)   | O(11)  | 104.6(2)   |  | C(18A) | C(17) | C(16A) | 120.6(7) |
| O(12) | P(4)   | C(39)  | 104.60(19) |  | C(5)   | C(4)  | C(3)   | 120.1(4) |
| O(8)  | P(3)   | O(7)   | 115.71(17) |  | C(4)   | C(5)  | C(6)   | 120.7(4) |
| O(8)  | P(3)   | O(9)   | 110.65(17) |  | C(27)  | C(26) | C(25)  | 120.5(4) |
| O(8)  | P(3)   | C(28)  | 109.29(17) |  | C(40)  | C(41) | C(36)  | 120.5(4) |
| O(7)  | P(3)   | O(9)   | 109.67(18) |  | C(6)   | C(7)  | C(8)   | 120.6(4) |
| O(7)  | P(3)   | C(28)  | 107.89(17) |  | C(12)  | C(13) | C(20)  | 124.2(4) |
| O(9)  | P(3)   | C(28)  | 102.80(17) |  | C(12)  | C(13) | C(14)  | 117.2(3) |
| C(34) | N(4)   | Pd(01) | 127.0(2)   |  | C(20)  | C(13) | C(14)  | 118.5(4) |
| C(31) | N(4)   | Pd(01) | 126.9(2)   |  | C(41)  | C(40) | C(39)  | 121.5(4) |
| C(31) | N(4)   | C(34)  | 106.1(3)   |  | N(3)   | C(20) | C(13)  | 126.2(4) |

|       |       |        |          |  |        |        |        |           |
|-------|-------|--------|----------|--|--------|--------|--------|-----------|
| C(9)  | N(2)  | Pd(01) | 126.5(2) |  | N(3)   | C(20)  | C(21)  | 109.5(3)  |
| C(9)  | N(2)  | C(12)  | 106.9(3) |  | C(13)  | C(20)  | C(21)  | 124.3(4)  |
| C(12) | N(2)  | Pd(01) | 126.5(2) |  | C(19)  | C(14)  | C(13)  | 121.0(5)  |
| C(4S) | N(2S) | C(3S)  | 112.6(3) |  | C(15)  | C(14)  | C(13)  | 119.1(5)  |
| C(42) | N(1)  | Pd(01) | 126.8(2) |  | C(15)  | C(14)  | C(19)  | 119.2(6)  |
| C(1)  | N(1)  | Pd(01) | 127.0(3) |  | C(15A) | C(14)  | C(13)  | 116.7(5)  |
| C(1)  | N(1)  | C(42)  | 106.2(3) |  | C(19A) | C(14)  | C(13)  | 125.1(6)  |
| C(20) | N(3)  | Pd(01) | 126.3(3) |  | C(19A) | C(14)  | C(15A) | 117.9(6)  |
| C(23) | N(3)  | Pd(01) | 127.3(3) |  | N(3)   | C(23)  | C(24)  | 125.5(3)  |
| C(23) | N(3)  | C(20)  | 106.3(3) |  | N(3)   | C(23)  | C(22)  | 109.8(3)  |
| C(2S) | N(1S) | C(1S)  | 113.0(4) |  | C(24)  | C(23)  | C(22)  | 124.5(4)  |
| C(27) | C(28) | P(3)   | 122.5(3) |  | N(1)   | C(42)  | C(35)  | 125.9(3)  |
| C(27) | C(28) | C(29)  | 118.9(3) |  | N(1)   | C(42)  | C(43)  | 109.4(3)  |
| C(29) | C(28) | P(3)   | 118.6(3) |  | C(35)  | C(42)  | C(43)  | 124.7(4)  |
| N(4)  | C(34) | C(33)  | 109.3(3) |  | C(36)  | C(37)  | C(38)  | 121.0(4)  |
| N(4)  | C(34) | C(35)  | 125.9(3) |  | C(37)  | C(38)  | C(39)  | 120.4(4)  |
| C(35) | C(34) | C(33)  | 124.7(3) |  | N(1)   | C(1)   | C(2)   | 126.1(3)  |
| C(5)  | C(6)  | P(1)   | 121.2(3) |  | N(1)   | C(1)   | C(44)  | 109.5(3)  |
| C(7)  | C(6)  | P(1)   | 119.7(3) |  | C(2)   | C(1)   | C(44)  | 124.4(4)  |
| C(7)  | C(6)  | C(5)   | 119.1(3) |  | C(44)  | C(43)  | C(42)  | 107.3(4)  |
| C(11) | C(10) | C(9)   | 107.4(3) |  | C(21)  | C(22)  | C(23)  | 107.0(4)  |
| C(30) | C(25) | C(24)  | 120.4(3) |  | C(43)  | C(44)  | C(1)   | 107.6(4)  |
| C(30) | C(25) | C(26)  | 118.4(3) |  | C(22)  | C(21)  | C(20)  | 107.4(4)  |
| C(26) | C(25) | C(24)  | 121.1(3) |  | C(17)  | C(18)  | C(19)  | 121.5(7)  |
| N(2)  | C(9)  | C(10)  | 109.1(3) |  | C(14)  | C(19)  | C(18)  | 119.3(7)  |
| N(2)  | C(9)  | C(2)   | 126.7(3) |  | C(15)  | C(16)  | C(17)  | 121.9(7)  |
| C(2)  | C(9)  | C(10)  | 124.2(3) |  | C(14)  | C(15)  | C(16)  | 120.1(7)  |
| C(8)  | C(3)  | C(2)   | 120.0(3) |  | C(16A) | C(15A) | C(14)  | 119.6(8)  |
| C(8)  | C(3)  | C(4)   | 119.1(3) |  | C(17)  | C(16A) | C(15A) | 118.6(8)  |
| C(4)  | C(3)  | C(2)   | 120.9(3) |  | C(17)  | C(18A) | C(19A) | 120.2(9)  |
| C(33) | C(32) | C(31)  | 107.2(3) |  | C(14)  | C(19A) | C(18A) | 122.7(9)  |
| C(28) | C(27) | C(26)  | 120.8(4) |  | C(5S)  | N(3S)  | C(6S)  | 116.0(7)  |
| C(32) | C(33) | C(34)  | 107.7(3) |  | C(11S) | N(5S)  | C(10S) | 121.6(11) |
| C(10) | C(11) | C(12)  | 107.2(3) |  | C(12S) | N(5S)  | C(11S) | 119.9(10) |
| C(29) | C(30) | C(25)  | 120.8(4) |  | C(12S) | N(5S)  | C(10S) | 118.4(12) |
| N(4)  | C(31) | C(32)  | 109.6(3) |  | O(2S)  | C(12S) | N(5S)  | 127.7(12) |
| N(4)  | C(31) | C(24)  | 125.6(3) |  | C(9S)  | N(4S)  | C(8S)  | 118.6(14) |
| C(24) | C(31) | C(32)  | 124.7(3) |  | C(7S)  | N(4S)  | C(9S)  | 125.3(15) |
| C(9)  | C(2)  | C(3)   | 117.7(3) |  | C(7S)  | N(4S)  | C(8S)  | 116.1(14) |
| C(1)  | C(2)  | C(9)   | 123.7(3) |  | O(1S)  | C(9S)  | N(4S)  | 129.1(13) |

|      |      |      |          |  |  |  |  |
|------|------|------|----------|--|--|--|--|
| C(1) | C(2) | C(3) | 118.6(3) |  |  |  |  |
|------|------|------|----------|--|--|--|--|

**Table S4.** Hydrogen bonds for **HOF-IPCE-1Pd**.

| D     | H      | A                  | d(D-H)/Å | d(H-A)/Å | d(D-A)/Å | D-H-A/° |
|-------|--------|--------------------|----------|----------|----------|---------|
| O(1)  | H(1)   | O(5) <sup>1</sup>  | 0.84     | 1.65     | 2.491(4) | 175.6   |
| O(11) | H(11)  | O(4) <sup>2</sup>  | 0.84     | 1.75     | 2.537(4) | 156.2   |
| O(6)  | H(6)   | O(3) <sup>3</sup>  | 0.84     | 1.70     | 2.529(4) | 167.5   |
| O(9)  | H(9)   | O(2) <sup>4</sup>  | 0.84     | 1.69     | 2.522(4) | 169.5   |
| N(2S) | H(2SA) | O(3) <sup>5</sup>  | 0.91     | 1.89     | 2.765(4) | 162.0   |
| N(2S) | H(2SB) | O(2) <sup>6</sup>  | 0.91     | 1.83     | 2.735(4) | 170.7   |
| O(12) | H(12)  | O(7) <sup>1</sup>  | 0.84     | 1.68     | 2.441(4) | 148.6   |
| N(1S) | H(1SA) | O(4) <sup>7</sup>  | 0.91     | 1.88     | 2.759(4) | 161.4   |
| N(1S) | H(1SB) | O(10) <sup>8</sup> | 0.91     | 1.81     | 2.709(4) | 171.6   |
| N(3S) | H(3SE) | O(8) <sup>9</sup>  | 0.91     | 1.80     | 2.690(7) | 165.3   |

<sup>1</sup>1+X,-1+Y,+Z; <sup>2</sup>1+X,+Y,-1+Z; <sup>3</sup>-1+X,1+Y,+Z; <sup>4</sup>-1+X,1+Y,-1+Z; <sup>5</sup>+X,1+Y,-1+Z; <sup>6</sup>1-X,1-Y,1-Z; <sup>7</sup>+X,+Y,-1+Z; <sup>8</sup>1-X,1-Y,-Z; <sup>9</sup>-X,2-Y,1-Z

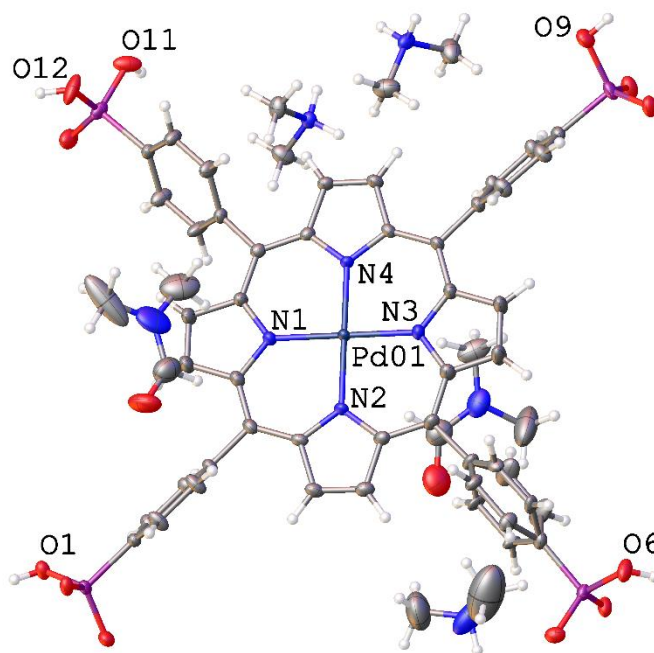

**Figure S11.** Asymmetric unit of **HOF-IPCE-1Pd**. (Pd: dark blue spheres, C: gray spheres, O: red spheres, N: blue spheres, P: orange spheres). Hydrogen atoms of porphyrin molecule and phenyl rings are omitted for the clarity.

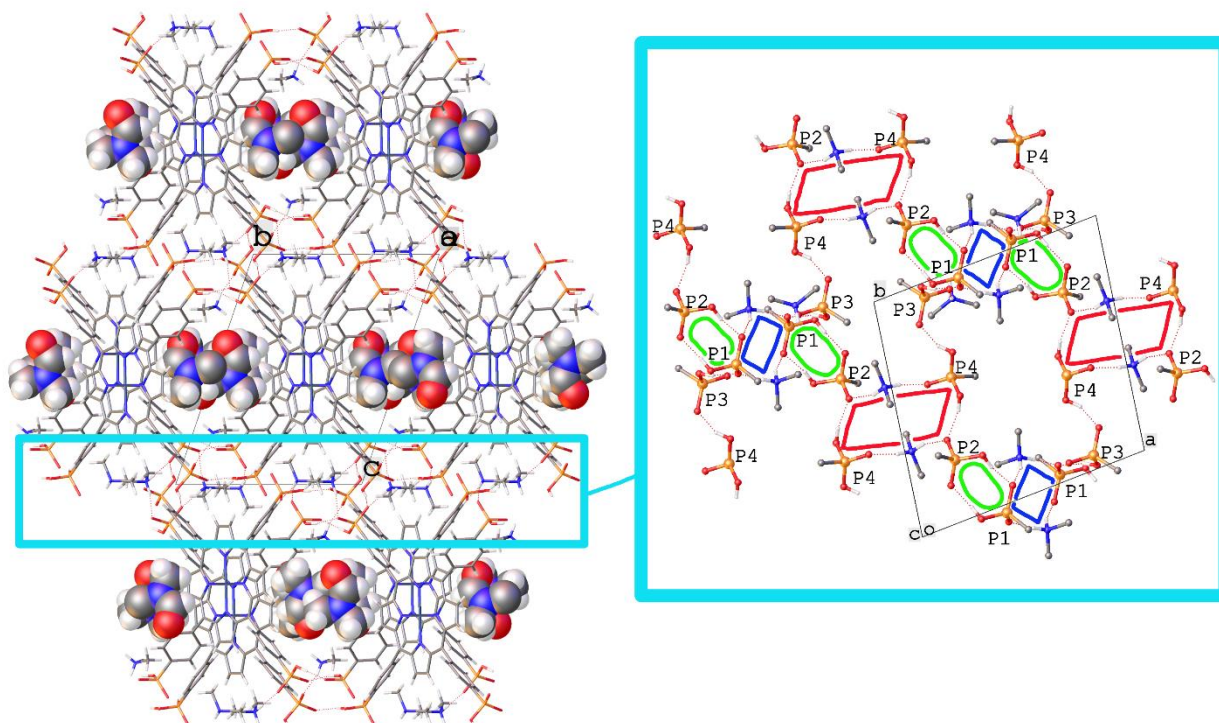

**Figure S12.** Packing of **HOF-IPCE-1Pd**. View along [100]. DMF molecules are shown by sphere packing. View along [001] on hydrogen-bonded 2D layer (the blue frame).

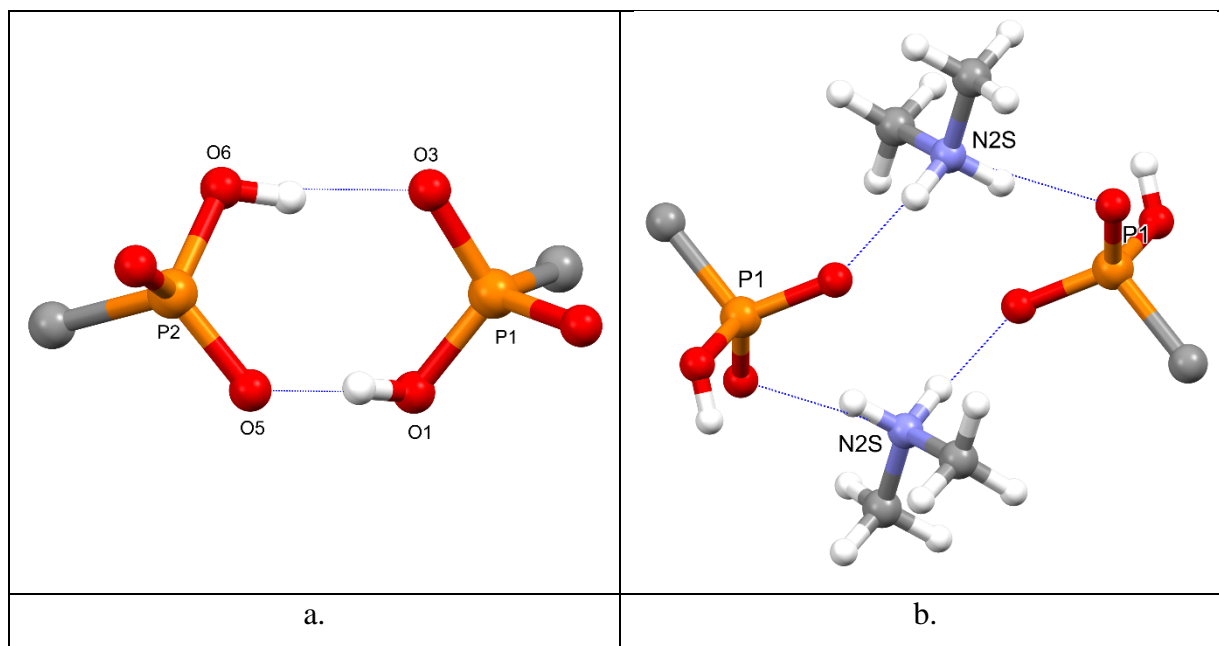

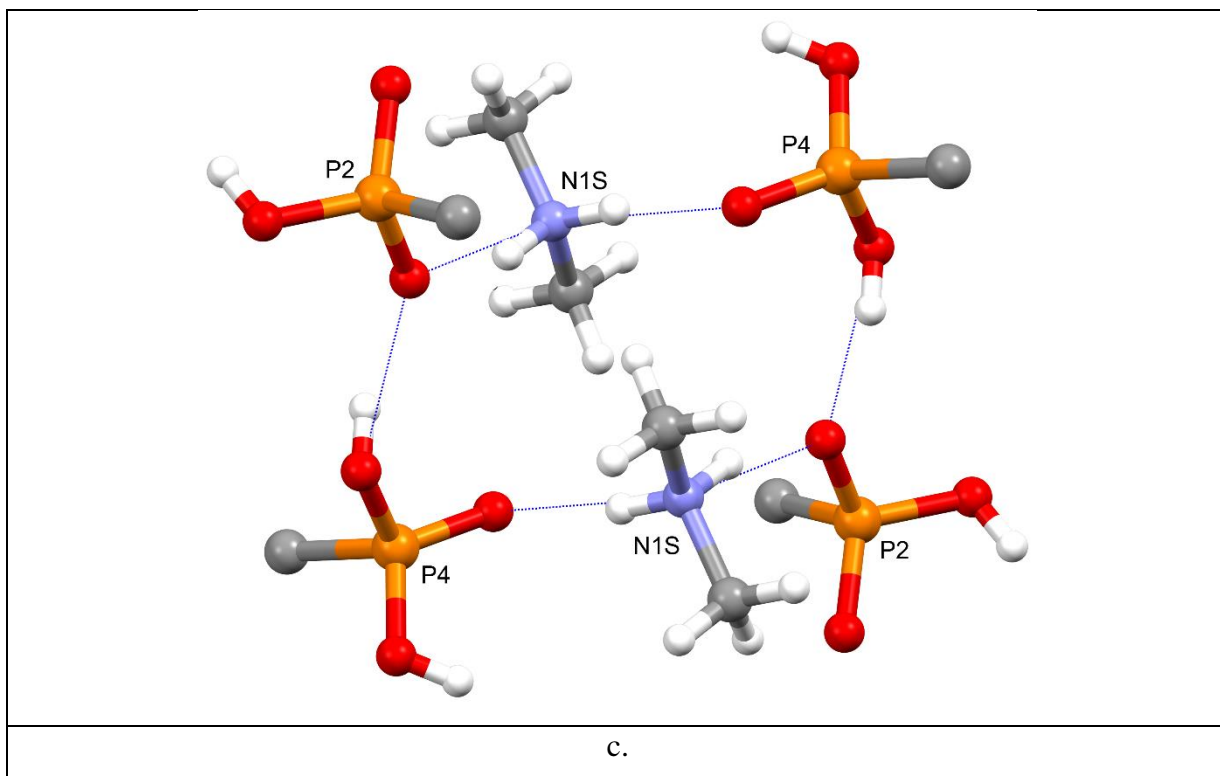

**Figure S13.** Graphical representation of hydrogen bonds of phosphonate groups of **Pd-H<sub>5</sub>TPPP<sup>3-</sup>** in **HOF-IPCE-1Pd**.

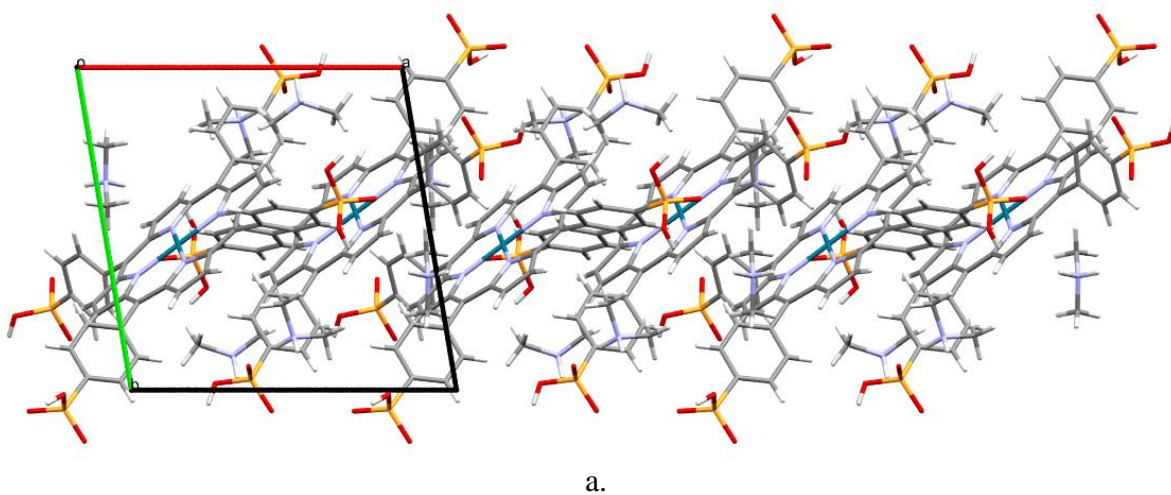

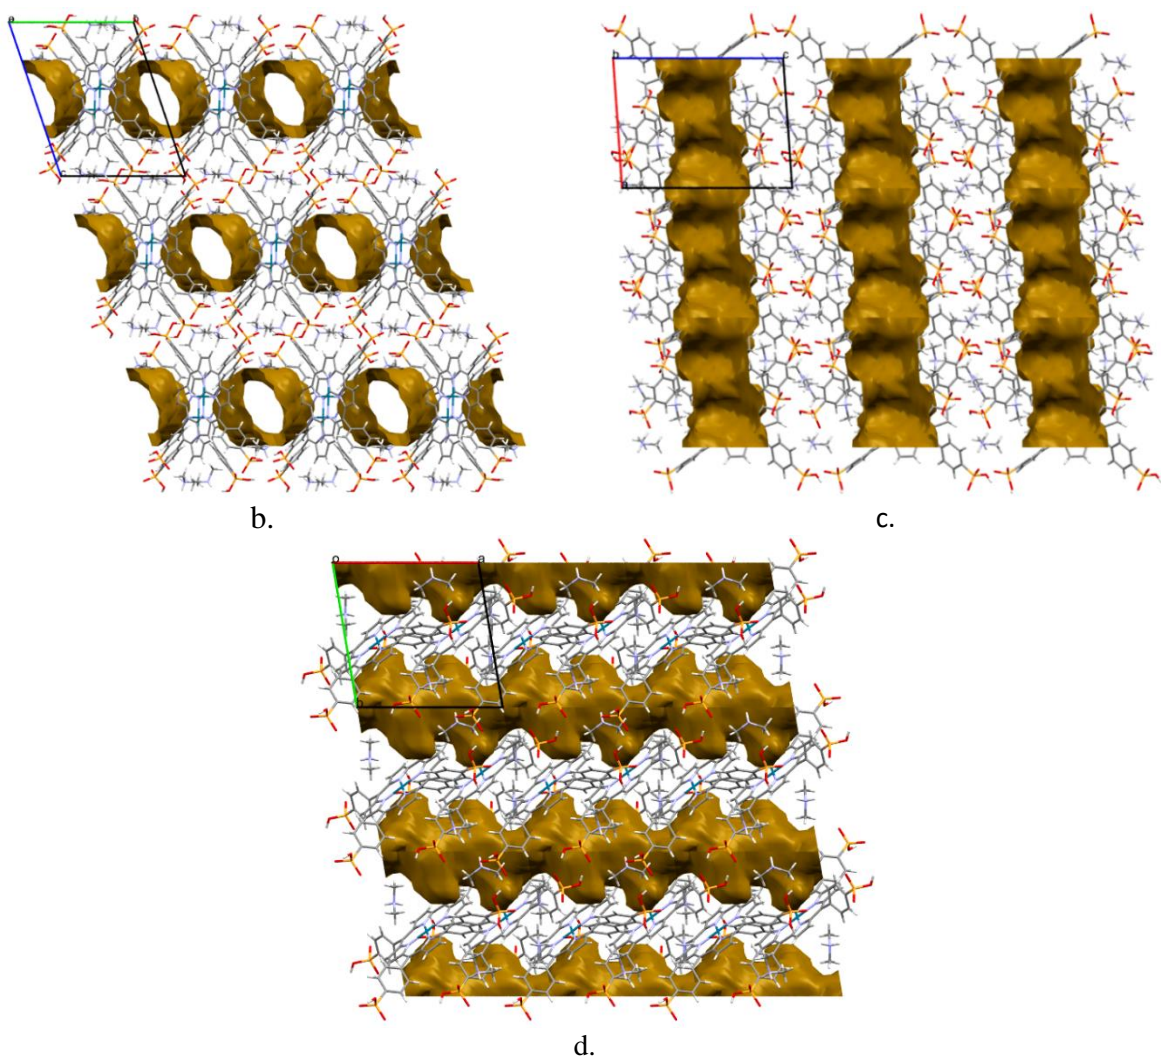

**Figure S14.** 3D packing of **HOF-IPCE-1Pd** a) one porphyrin stack along *a*, view along [001], b) 1D open channels along *a*, view along [100] direction, c) 1D open channels along *a*, view along [010] direction, d) 1D open channels along *a*, view along [001] direction.

**Table S5.** Comparison of channels size for several porphyrin-based HOFs.

|                          | Di  | Df  | Dif | Dimensionality | Reference  |
|--------------------------|-----|-----|-----|----------------|------------|
| <b>IPCE-HOF-1Pd</b>      | 5.8 | 3.8 | 5.8 | 1              | This paper |
| <b>GTUB5</b>             | 5.4 | 4.9 | 5.4 | 1              | 1          |
| <b>H<sub>2</sub>TPPA</b> | 6.0 | 4.1 | 6.0 | 1              | 2          |
| <b>HOF-7</b>             | 8.8 | 5.8 | 8.8 | 3              | 3          |
| <b>HOF-6</b>             | 7.8 | 5.2 | 7.8 | 3              | 4          |

### PXRD patterns of HOF-IPCE-1Pd in different solvents

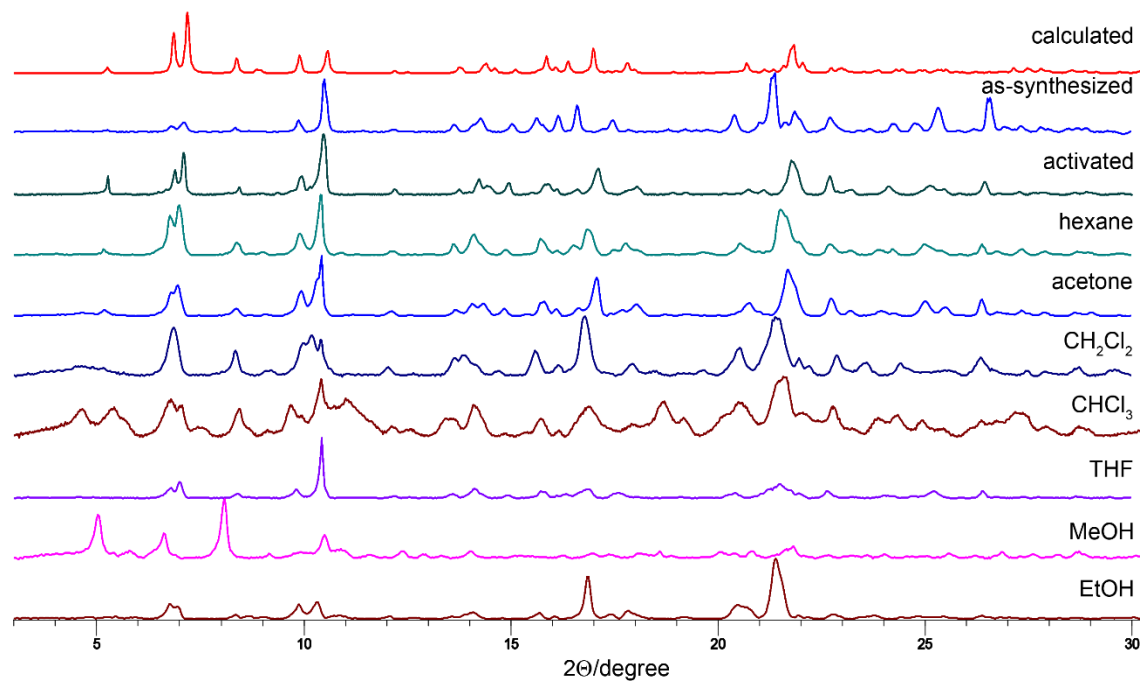

**Figure S15.** PXRD patterns of **HOF-IPCE-1Pd** treated by immersion in different solvents for 7 days.

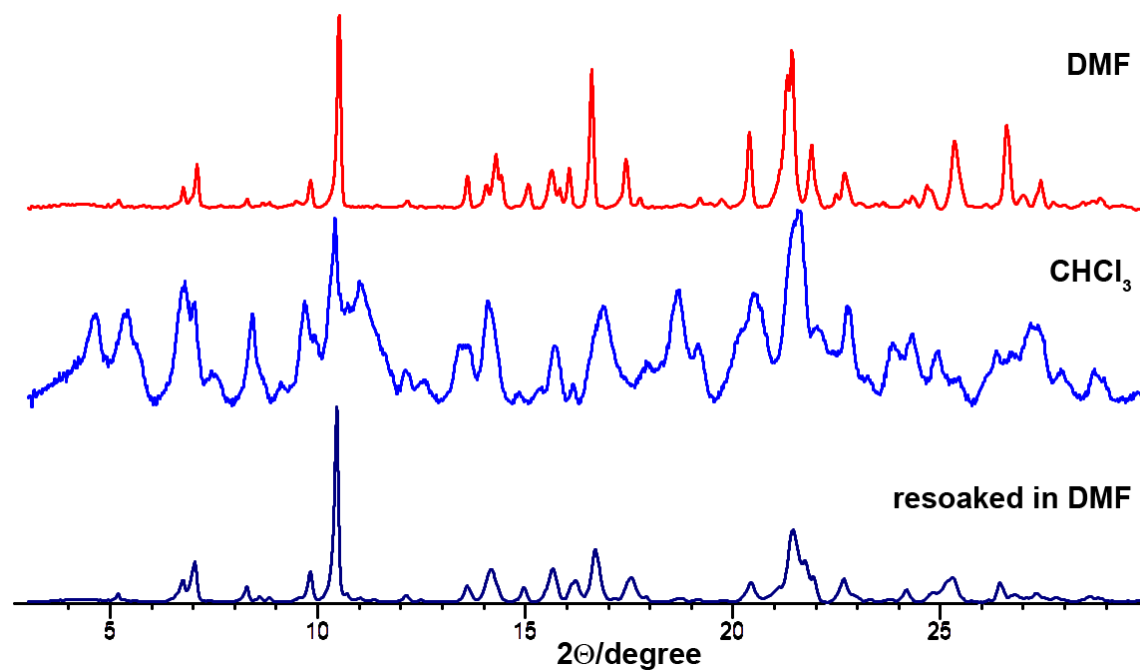

**Figure S16.** PXRD patterns of **HOF-IPCE-1Pd** treated by immersion in DMF and chloroform in comparison with data recorded for a sample re-soaked in DMF.



## Pawley-refinements of HOF-IPCE-1Pd immersed in various solvents

For all samples of **HOF-IPCE-1Pd** immersed in various solvents, the triclinic unit cell dimensions and space group P-1 were tested in Pawley fits<sup>5</sup> with the program *MRIA*<sup>6</sup>. The unit cell dimensions are shown in **Table S6**.

**Table S6.** The triclinic unit cell parameters of **HOF-IPCE-1Pd** immersed in different solvents obtained in the Pawley fitting of the powder patterns measured in 3 – 30° 2 $\theta$  range.

|                                           | $a$ , Å    | $b$ , Å    | $c$ , Å    | $\alpha$ , ° | $\beta$ , ° | $\gamma$ , ° |
|-------------------------------------------|------------|------------|------------|--------------|-------------|--------------|
| <b>DMF</b>                                | 13.247(5)  | 14.088(7)  | 17.991(9)  | 69.63(6)     | 82.20(9)    | 77.17(8)     |
| <b>HOF-IPCE-1Pd</b><br>(activated sample) | 12.937(4)  | 13.932(4)  | 18.042(7)  | 69.62(5)     | 82.47(7)    | 78.92(6)     |
| <b>hexane</b>                             | 13.006(6)  | 14.108(8)  | 18.097(10) | 69.11(7)     | 81.95(9)    | 77.99(9)     |
| <b>acetone</b>                            | 12.969(7)  | 14.037(8)  | 18.224(11) | 68.74(7)     | 81.55(9)    | 77.83(8)     |
| <b>THF</b>                                | 12.986(11) | 14.140(12) | 18.108(17) | 69.77(8)     | 81.90(13)   | 77.10(9)     |

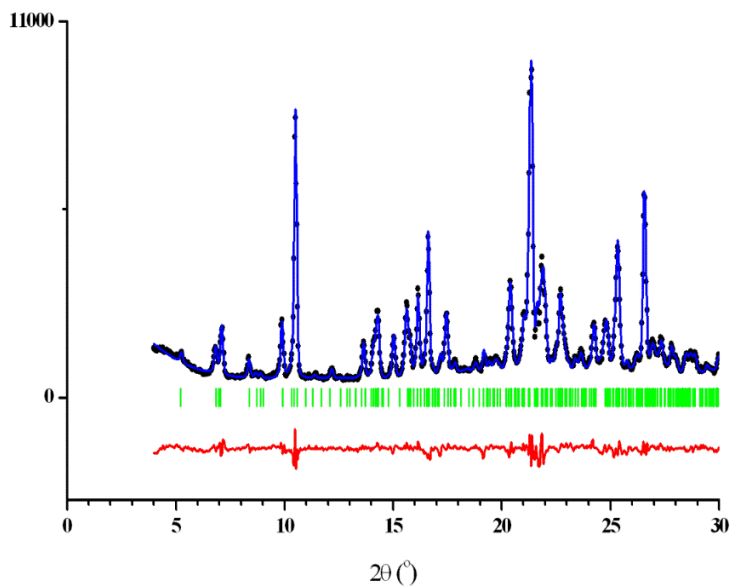

**Figure S17.** The result of the Pawley fitting of **HOF-IPCE-1Pd** kept in **DMF** showing the experimental (black dots), calculated (blue line) and difference (red line) profiles. The vertical green bars denote calculated positions of the diffraction peaks for the triclinic crystal structure.

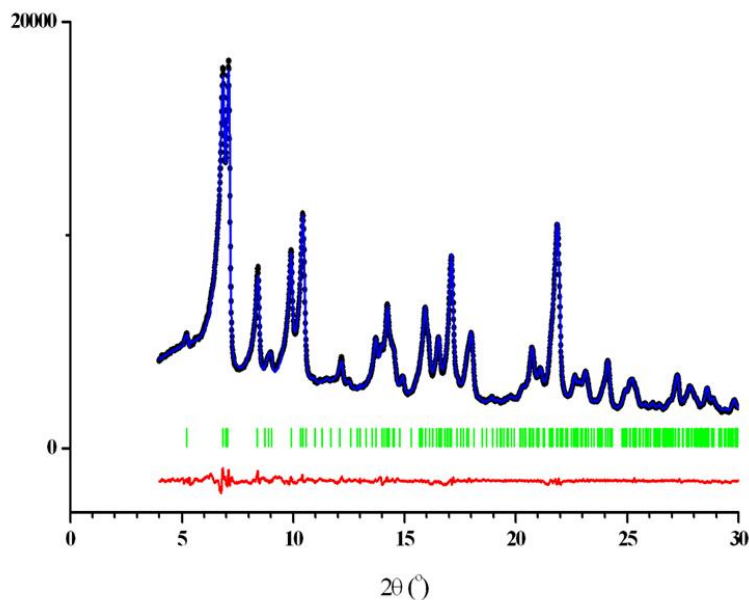

**Figure S18.** The result of the Pawley fitting of activated sample of **HOF-IPCE-1Pd** showing the experimental (black dots), calculated (blue line) and difference (red line) profiles. The vertical green bars denote calculated positions of the diffraction peaks for the triclinic crystal structure.

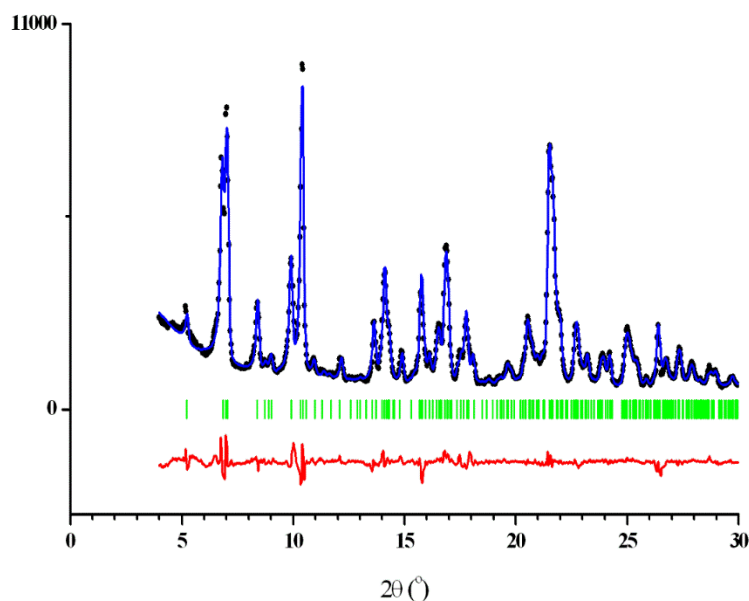

**Figure S19.** The result of the Pawley fitting of **HOF-IPCE-1Pd** kept in **hexane** showing the experimental (black dots), calculated (blue line) and difference (red line) profiles. The vertical green bars denote calculated positions of the diffraction peaks for the triclinic crystal structure.

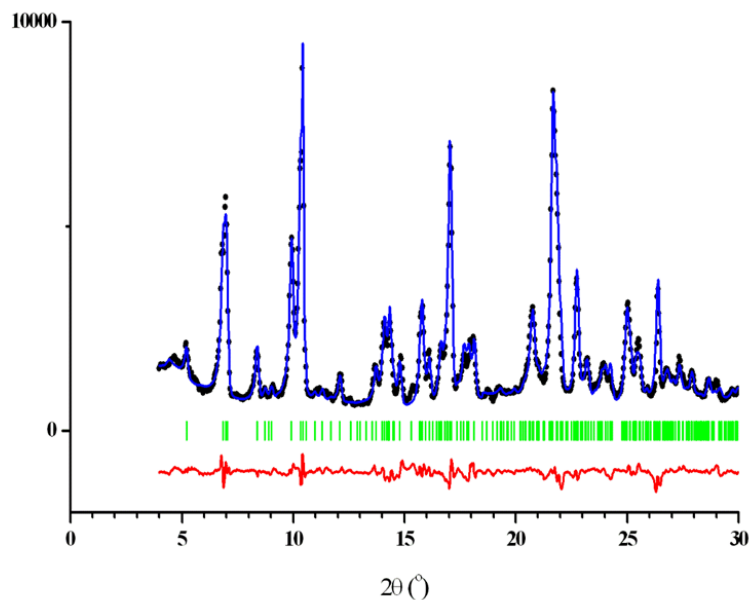

**Figure S20.** The result of the Pawley fitting of **HOF-IPCE-1Pd** kept in **acetone** showing the experimental (black dots), calculated (blue line) and difference (red line) profiles. The vertical green bars denote calculated positions of the diffraction peaks for the triclinic crystal structure.

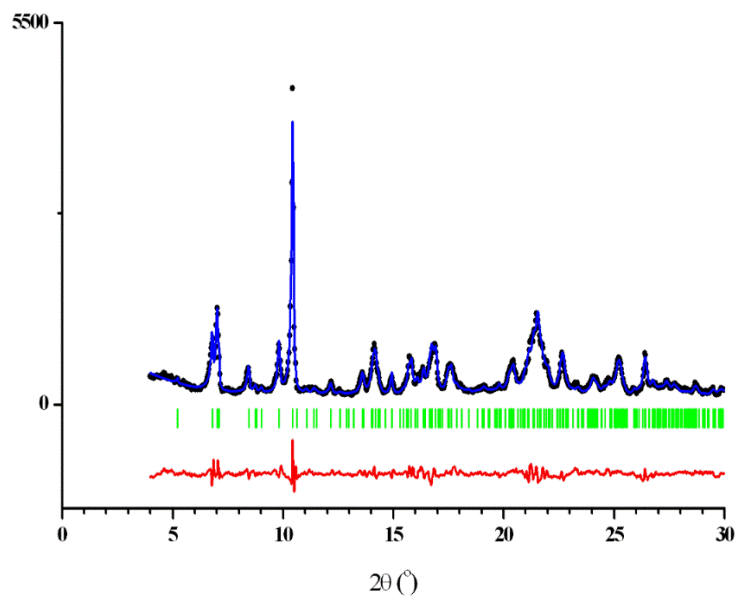

**Figure S21.** The result of the Pawley fitting of **HOF-IPCE-1Pd** kept in **THF** showing the experimental (black dots), calculated (blue line) and difference (red line) profiles. The vertical green bars denote calculated positions of the diffraction peaks for the triclinic crystal structure.

## XPS data of HOF-IPCE-1Pd

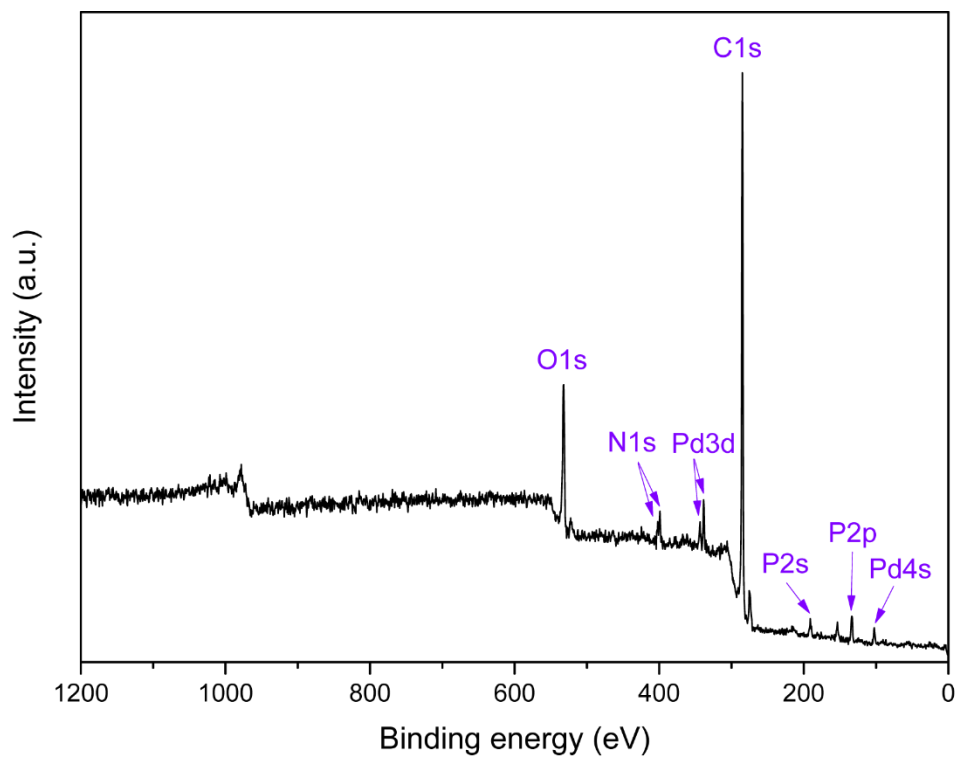

Figure S22. XPS spectrum of HOF-IPCE-1Pd.

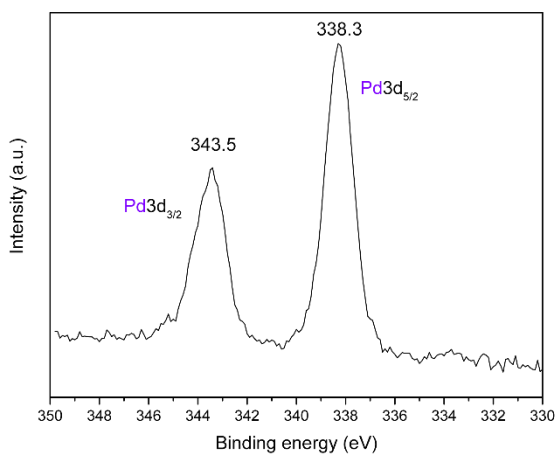

a.

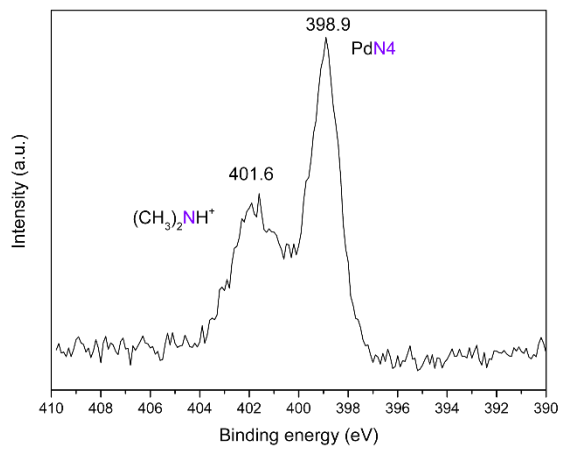

b.

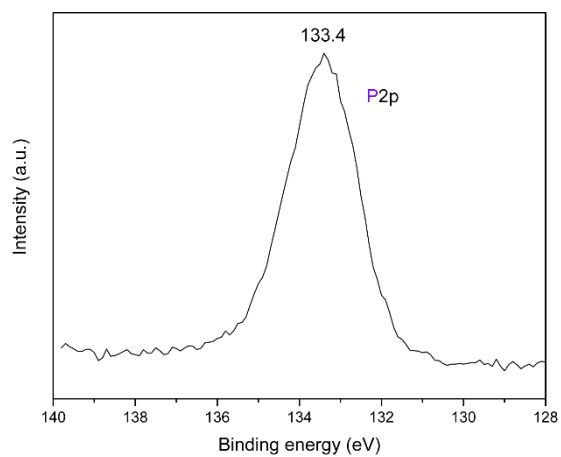

c.

**Figure S23.** (a) XPS spectrum of Pd3d of **HOF-IPCE-1Pd**. (b) XPS spectrum of N1s of **HOF-IPCE-1Pd**. (c) XPS spectrum of P2p of **HOF-IPCE-1Pd**.

### SEM and EDX data of HOF-IPCE-1Pd

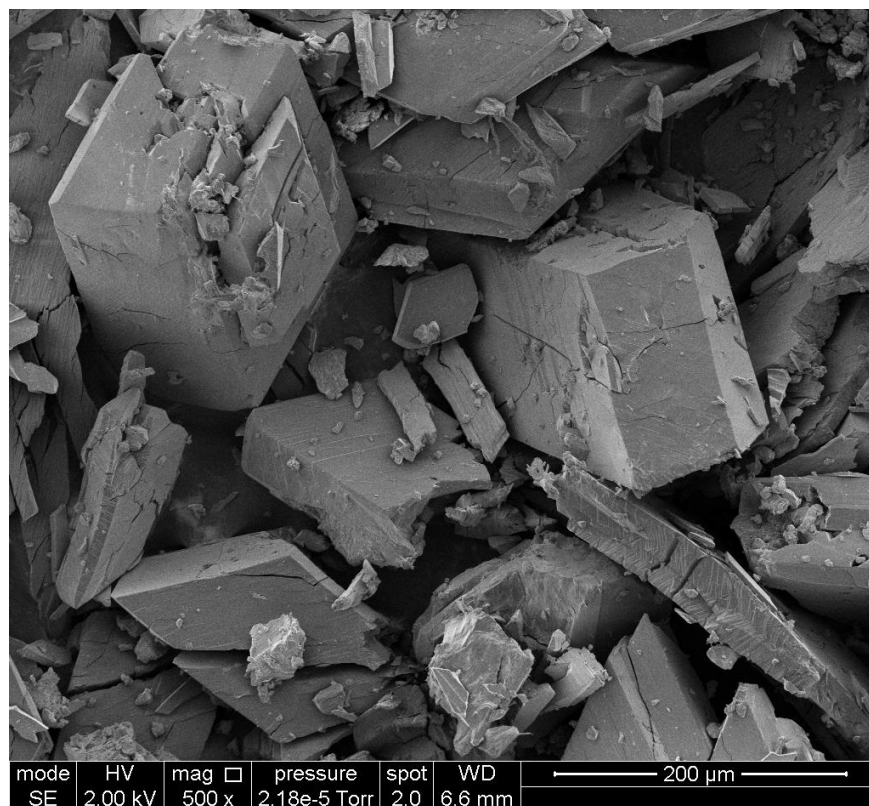

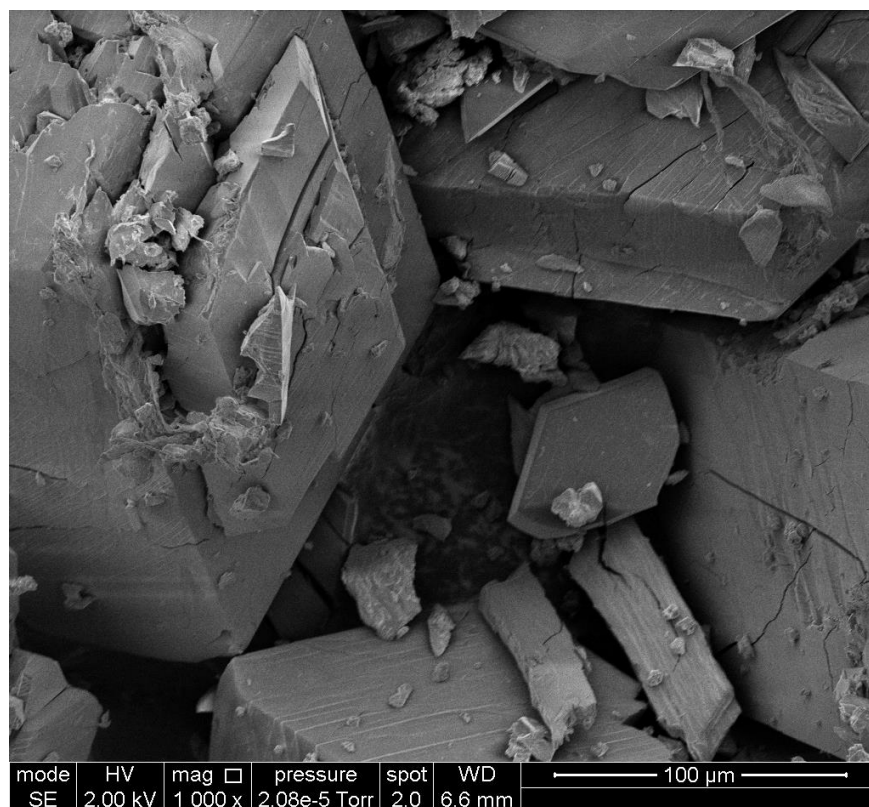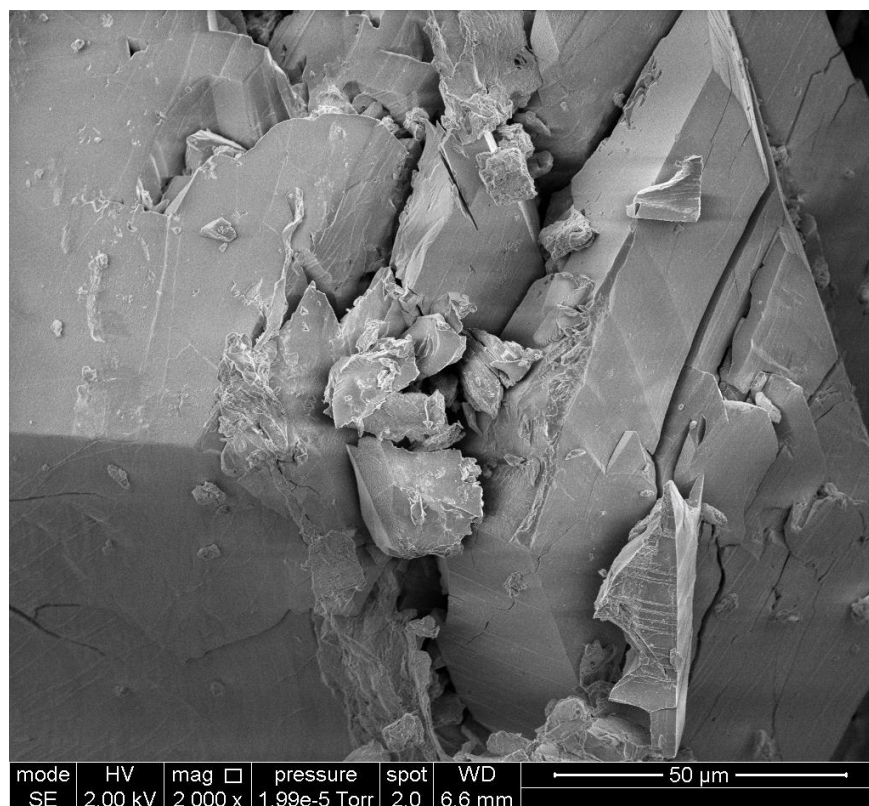

**Figure S24.** Typical scanning electron microscopy images of **HOF-IPCE-1Pd**.

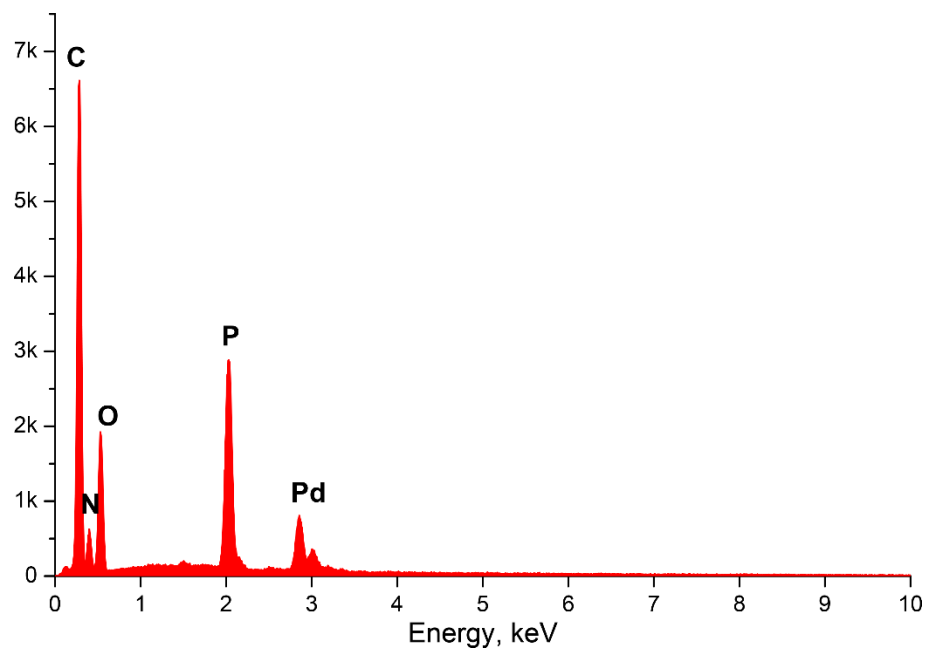

**Figure S25.** Typical EDX spectrum of **HOF-IPCE-1Pd**.

**Table S7.** Elemental analysis of **HOF-IPCE-1Pd** based on EDX spectroscopy data.

| Element | C    | N    | O    | P    | Pd   |
|---------|------|------|------|------|------|
| Wt, %   | 57.9 | 10.2 | 20.2 | 06.1 | 05.6 |
| At, %   | 68.3 | 10.4 | 17.9 | 02.8 | 00.8 |

### Thermal stability of HOF-IPCE-1Pd

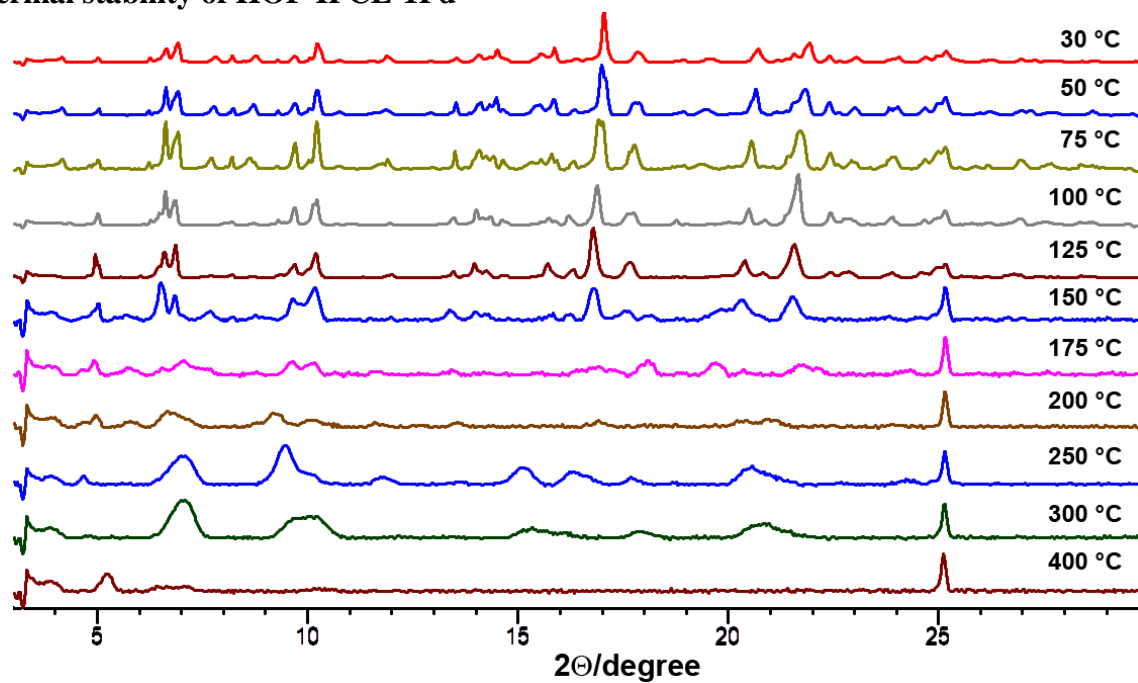

Figure S26. VT-PXRD patterns of **HOF-IPCE-1Pd** in the range of 30-400 °C.

### TG investigations of HOF-IPCE-1Pd.

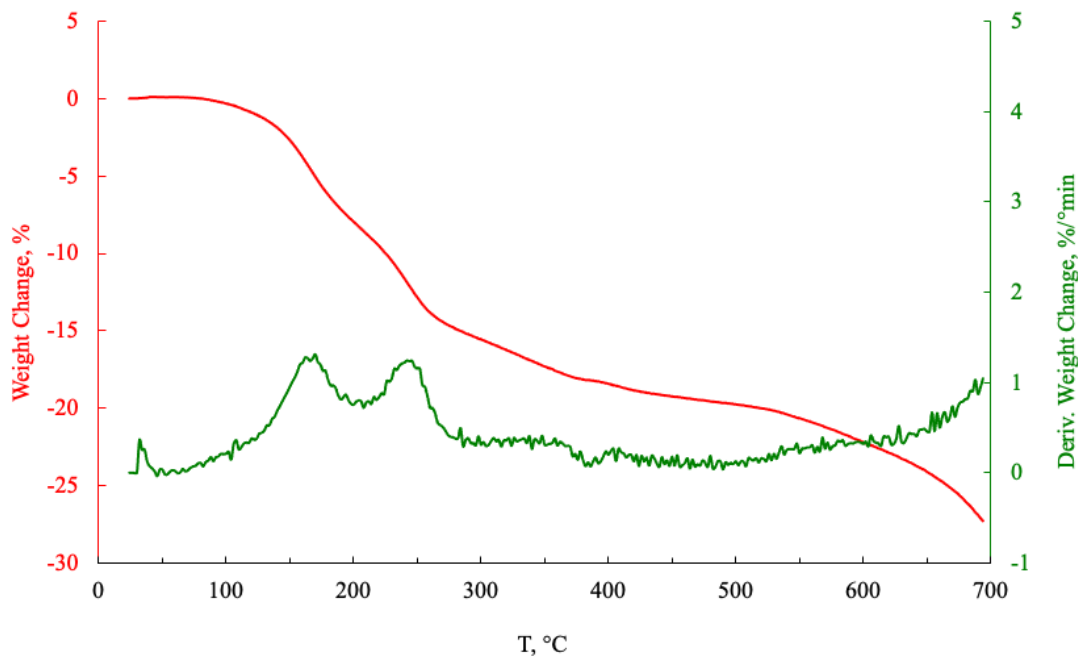

Figure S27. The TGA plot of **HOF-IPCE-1Pd**.



### Sorption properties of HOF-IPCE-1Pd

As-synthesized material of **HOF-IPCE-1Pd** was soaked in dry acetone for 72 h during which time the solvent was replaced three times with fresh portions. After removing the acetone, the sample was activated under a dynamic vacuum at least for 6 h. The CO<sub>2</sub> adsorption–desorption isotherms were measured within the range of relative pressures from 10<sup>-4</sup> to 0.995.

**Table S8.** The textural parameters of an activated sample of **HOF-IPCE-1Pd**.

| Temperature of activation | Specific surface area / m <sup>2</sup> ·g <sup>-1</sup> |      | Pore volume / cm <sup>3</sup> ·g <sup>-1</sup> |       | V <sub>ads</sub> / cm <sup>3</sup> (STP)·g <sup>-1</sup> |
|---------------------------|---------------------------------------------------------|------|------------------------------------------------|-------|----------------------------------------------------------|
|                           | BET                                                     | DFT  | Total                                          | DFT   |                                                          |
| 80 °C                     | 160.2                                                   | 77.7 | 0.114                                          | 0.078 | 53.9                                                     |
| 100 °C                    | 39.0                                                    | 21.8 | 0.040                                          | 0.028 | 19.5                                                     |

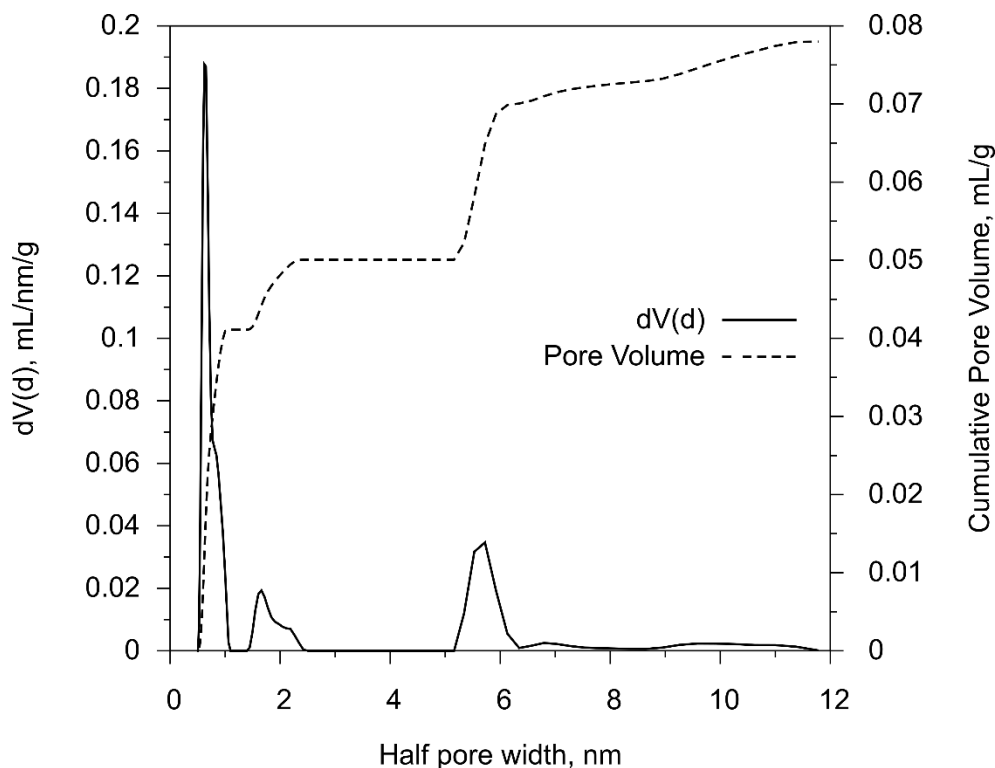

**Figure S28.** Pore size distribution curve for an activated sample of **HOF-IPCE-1Pd**.

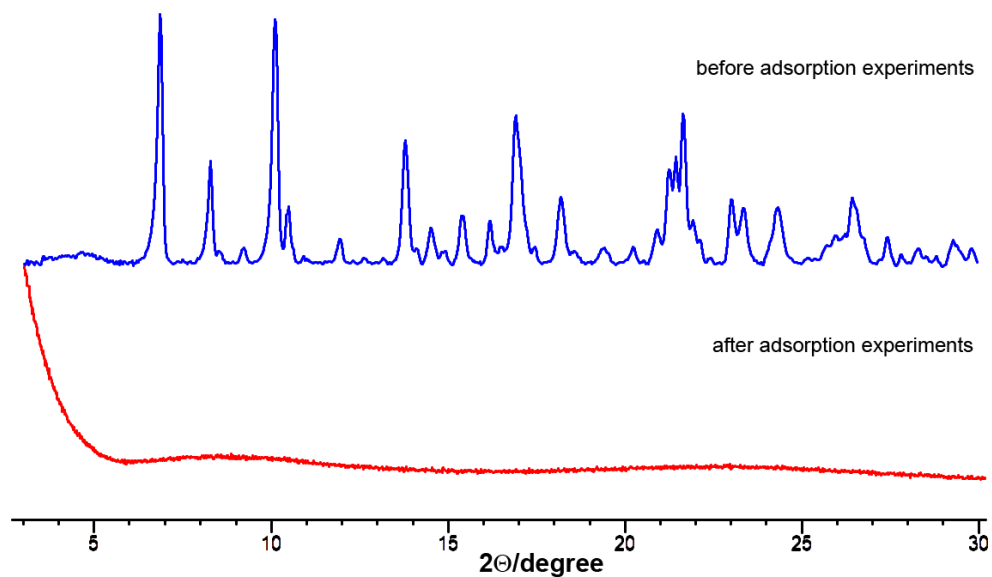

**Figure S29.** PXRD data for an activated sample of **HOF-IPCE-1Pd** before (the sample was activated at 80 °C) and after adsorption measurements.

### Proton conductivity of HOF-IPCE-1Pd

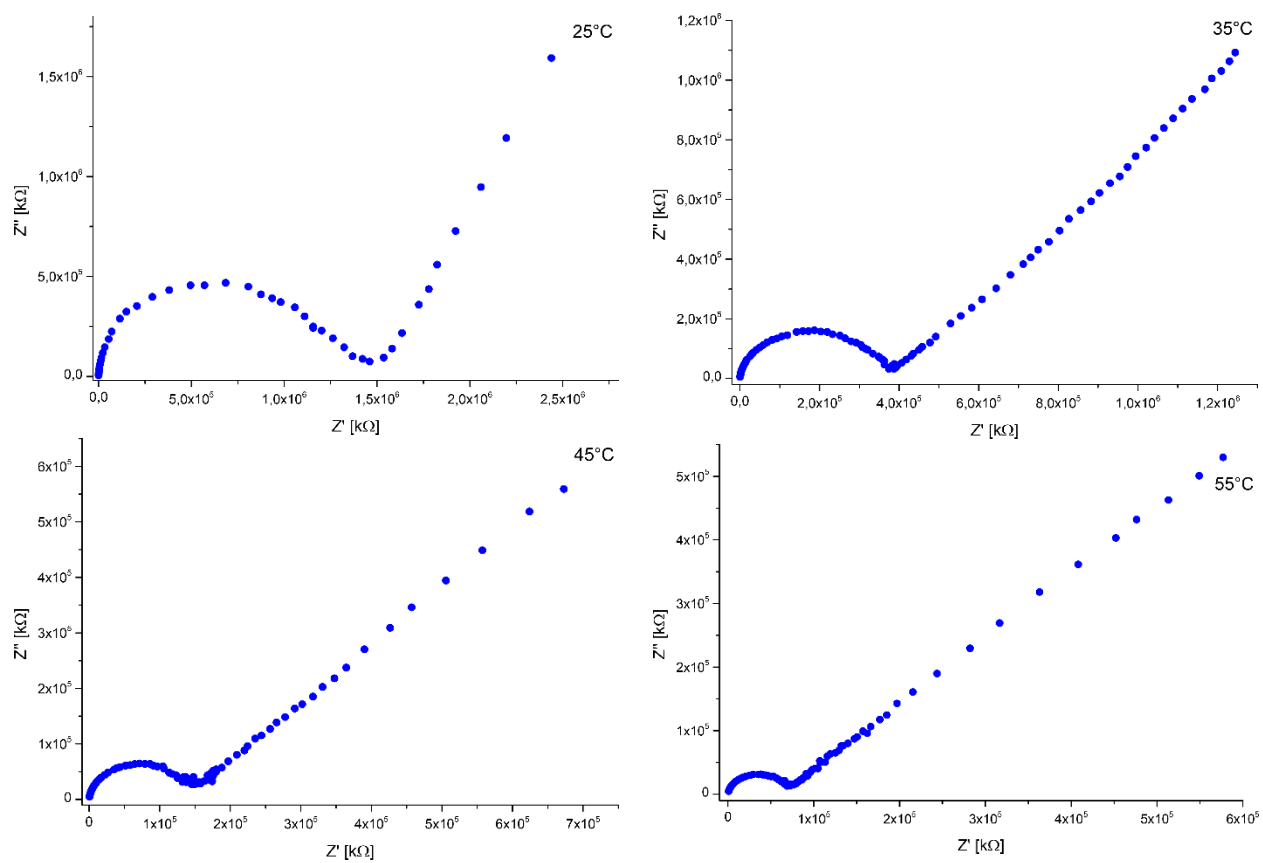

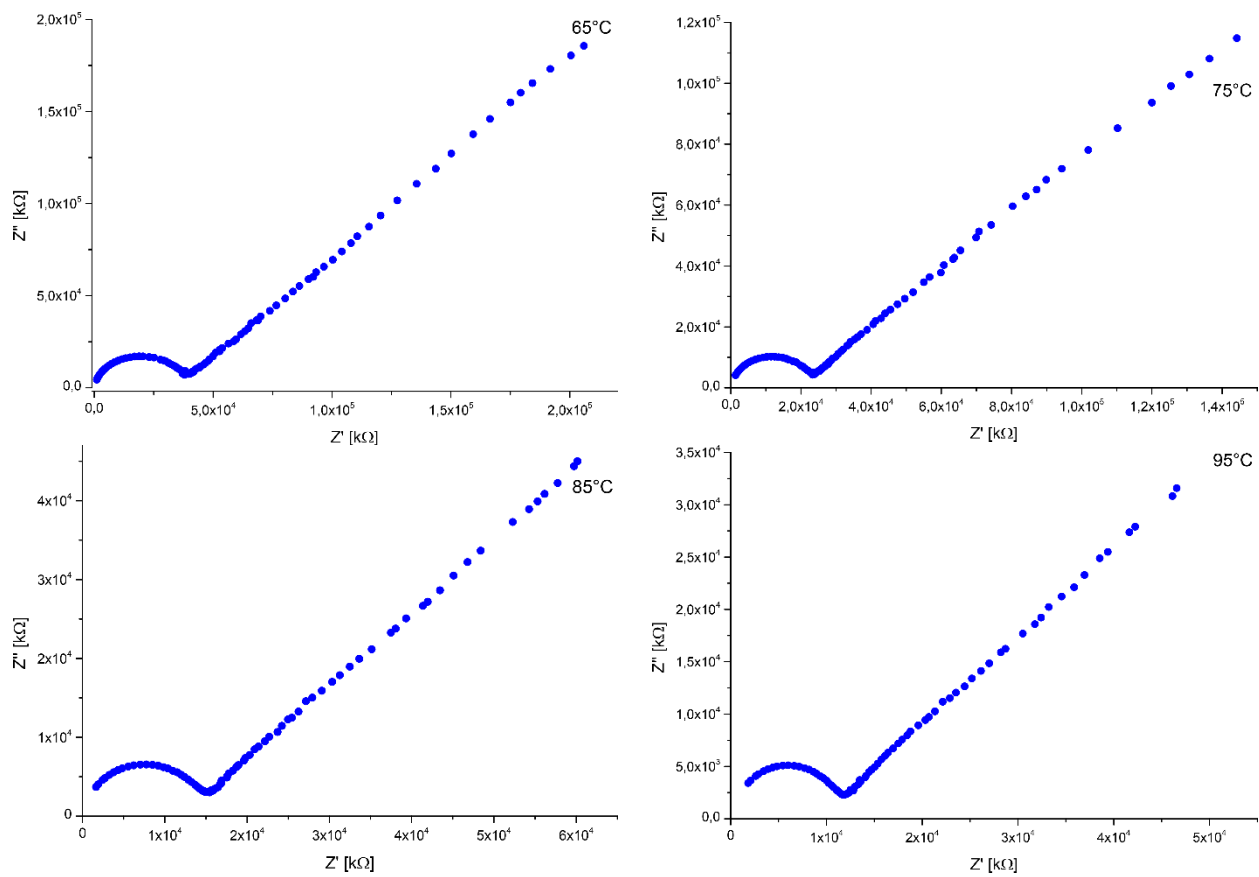

**Figure S30.** Nyquist plots of **HOF-IPCE-1Pd** at 32% RH and different temperatures.

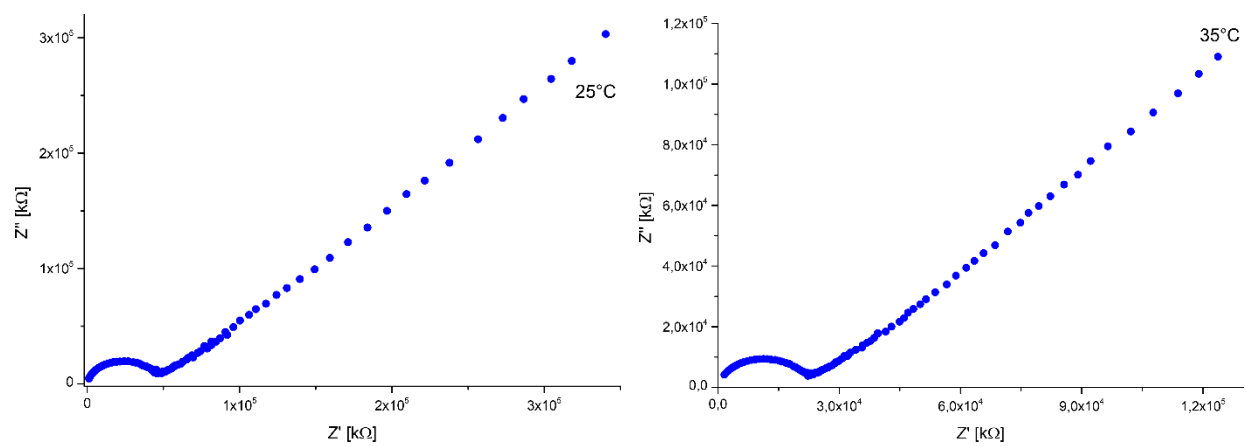

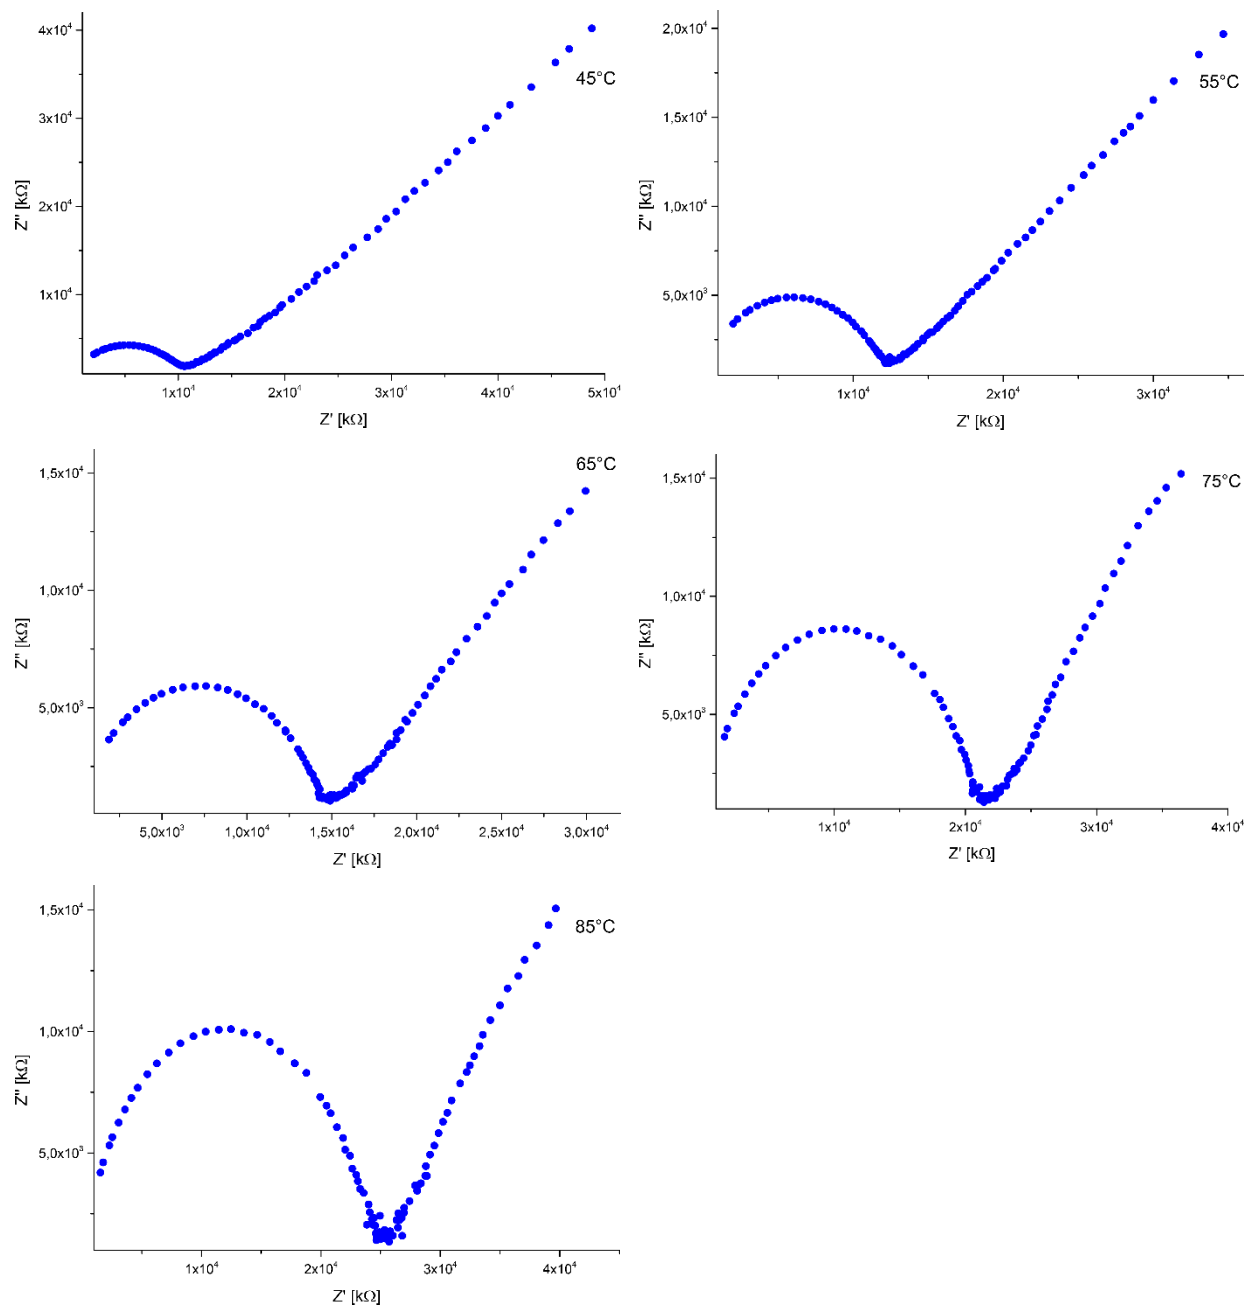

**Figure S31.** Nyquist plots of **HOF-IPCE-1Pd** at 60% RH and different temperatures.

## PXRD data and Pawley-refinements of HOF-IPCE-1Pd-NH<sub>3</sub>

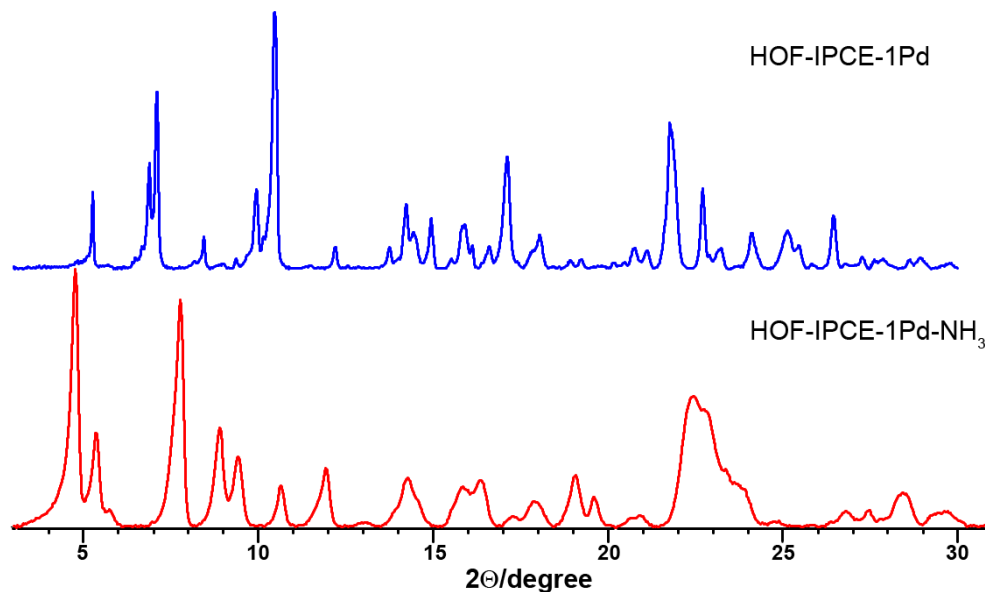

**Figure S32.** PXRD data for **HOF-IPCE-1Pd** and **HOF-IPCE-1Pd-NH<sub>3</sub>** samples.

For a sample **HOF-IPCE-1Pd-NH<sub>3</sub>** the triclinic unit cell dimensions and space group P-1 were tested in Pawley fits<sup>5</sup> with the program *MRIA*<sup>6</sup> ( $R_p = 0.025$ ,  $R_{wp} = 0.059$ ,  $R_{exp} = 0.014$ , GoF (Goodness of Fit) = 2.95).

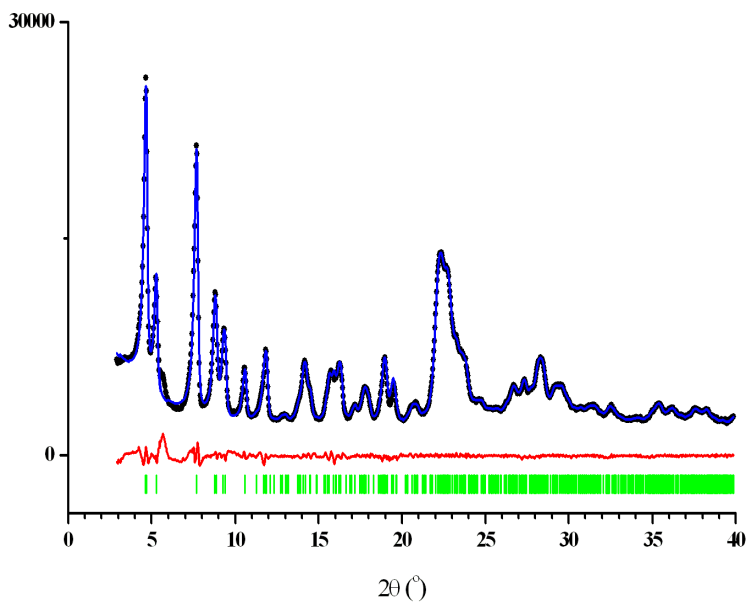

**Figure S33.** The result of the Pawley fitting of **HOF-IPCE-1Pd-NH<sub>3</sub>** showing the experimental (black dots), calculated (blue line) and difference (red line) profiles. The vertical green bars denote calculated positions of the diffraction peaks for the triclinic crystal structure.

### TG investigations of HOF-IPCE-1Pd-NH<sub>3</sub>

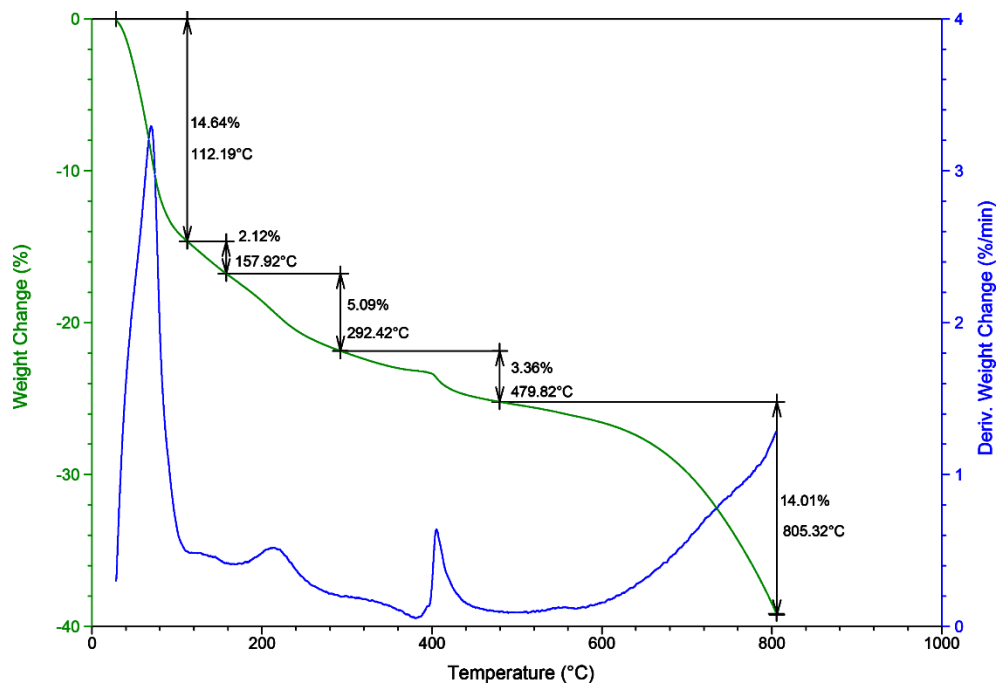

Figure S34. The TGA plot of HOF-IPCE-1Pd-NH<sub>3</sub>.

### IR spectrum of HOF-IPCE-1Pd-NH<sub>3</sub>

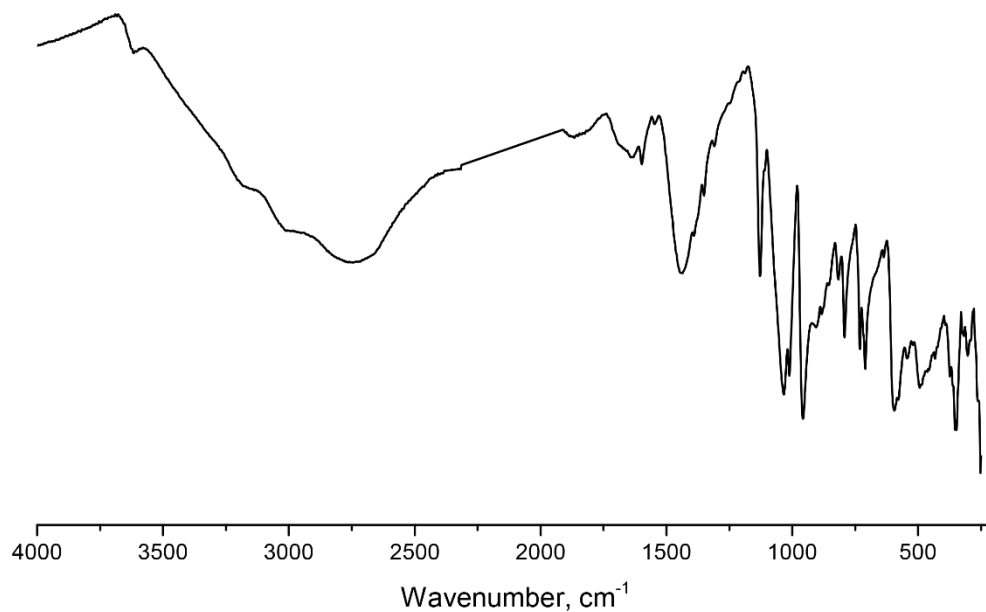

Figure S35. The IR spectrum of HOF-IPCE-1Pd-NH<sub>3</sub>.

# Proton conductivity of HOF-IPCE-1Pd-NH<sub>3</sub>

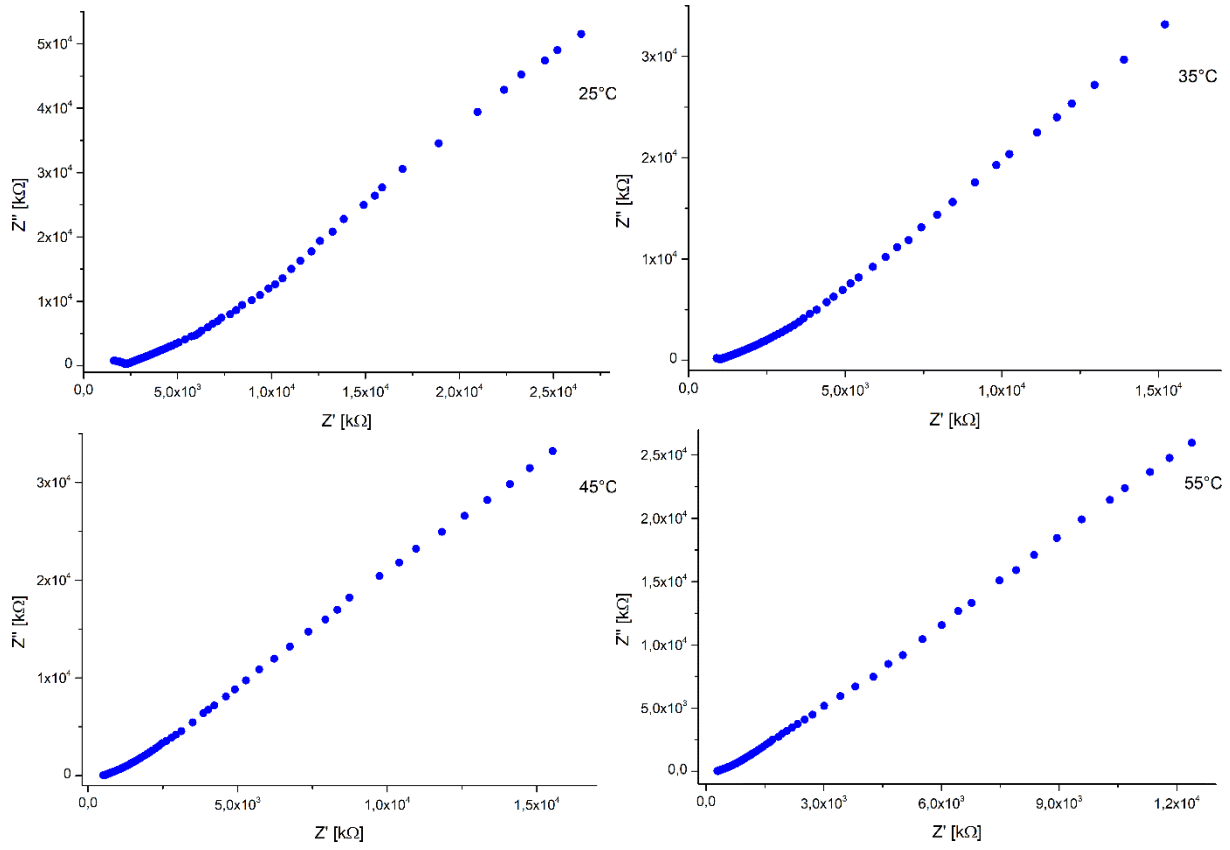

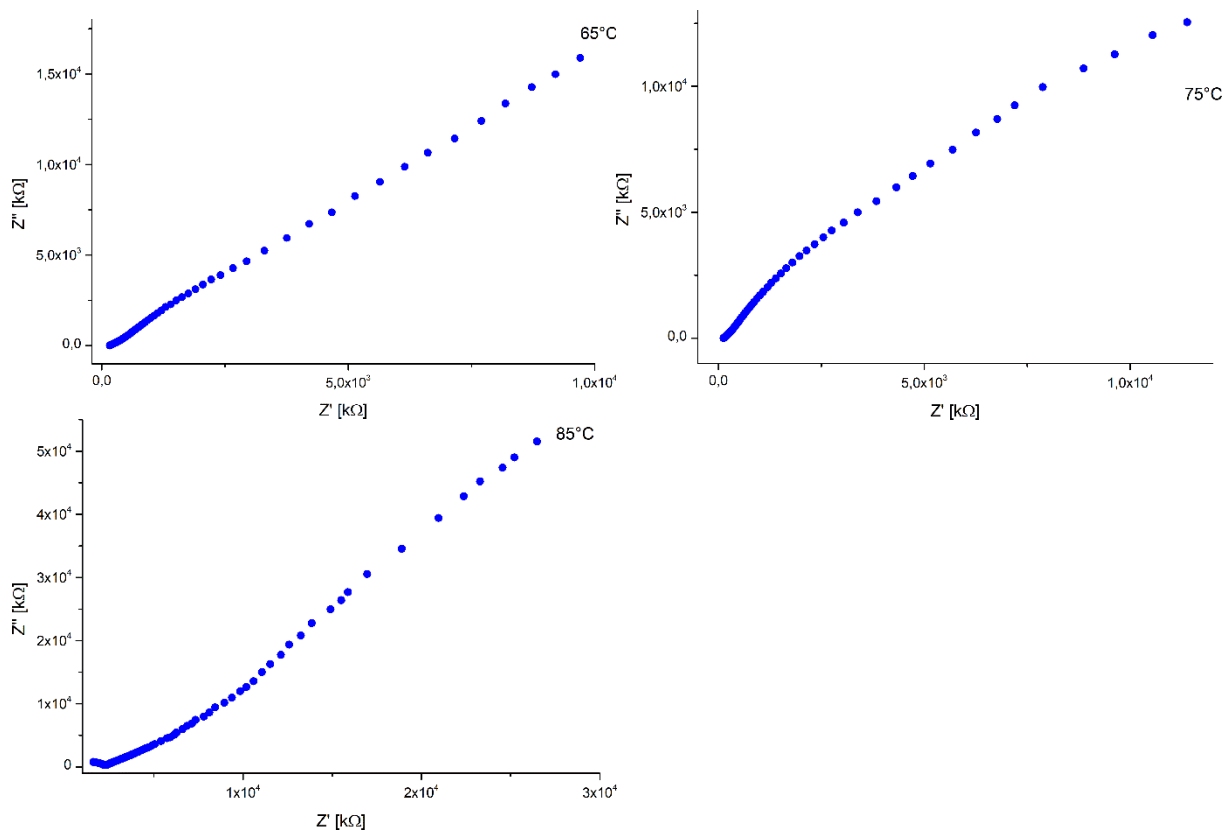

**Figure S36.** Nyquist plots of **HOF-IPCE-1Pd-NH<sub>3</sub>** at 60% RH and different temperatures.

## REFERENCES

- 1 P. Tholen, C. A. Peeples, R. Schaper, C. Bayraktar, T. S. Erkal, M. M. Ayhan, B. Çoşut, J. Beckmann, A. O. Yazaydin, M. Wark, G. Hanna, Y. Zorlu and G. Yücesan, *Nat. Commun.*, 2020, **11**, 3180.
- 2 N. Venkatramaiah, C. F. Pereira, R. F. Mendes, F. a. A. Paz and J. P. C. Tomé, *Anal. Chem.*, 2015, **87**, 4515–4522.
- 3 W. Yang, B. Li, H. Wang, O. Alduhaish, K. Alfooty, M. A. Zayed, P. Li, H. D. Arman and B. Chen, *Cryst. Growth Des.*, 2015, **15**, 2000–2004.
- 4 W. Yang, F. Yang, T.-L. Hu, S. C. King, H. Wang, H. Wu, W. Zhou, J.-R. Li, H. D. Arman and B. Chen, *Cryst. Growth Des.*, 2016, **16**, 5831–5835.
- 5 G. S. Pawley, *J. Appl. Crystallogr.*, 1981, **14**, 357–361.
- 6 V. B. Zlokazov and V. V. Chernyshev, *J. Appl. Crystallogr.*, 1992, **25**, 447–451.
